# Supplementary material for: Exploring experiential learning within interprofessional practice education initiatives for pre-licensure healthcare students: a scoping review
Source: PubMed Central journal article supplement (PMC10863283; doi:10.1186/s12909-024-05114-w), 2024-02-13
Supplement: 12909_2024_5114_MOESM1_ESM.pdf [file 12909_2024_5114_MOESM1_ESM.pdf]

## Supplementary File #1

### Literature Strategies and Results for Scoping Review

**Table 1. Medline**

| Database: MEDLINE(R) ALL <1946 to July 10, 2023> |                                                                                                                                                                                                                                                                                                                                                                                                                                                                                                                                                                                                                                                                                                                                                                                                                                                                                                                                                                                                                                                                                                                                                                                                                                                                                                                                                                                        |         |
|--------------------------------------------------|----------------------------------------------------------------------------------------------------------------------------------------------------------------------------------------------------------------------------------------------------------------------------------------------------------------------------------------------------------------------------------------------------------------------------------------------------------------------------------------------------------------------------------------------------------------------------------------------------------------------------------------------------------------------------------------------------------------------------------------------------------------------------------------------------------------------------------------------------------------------------------------------------------------------------------------------------------------------------------------------------------------------------------------------------------------------------------------------------------------------------------------------------------------------------------------------------------------------------------------------------------------------------------------------------------------------------------------------------------------------------------------|---------|
| Platform: OVID                                   |                                                                                                                                                                                                                                                                                                                                                                                                                                                                                                                                                                                                                                                                                                                                                                                                                                                                                                                                                                                                                                                                                                                                                                                                                                                                                                                                                                                        |         |
| Date Searched: Jul 11, 2023                      |                                                                                                                                                                                                                                                                                                                                                                                                                                                                                                                                                                                                                                                                                                                                                                                                                                                                                                                                                                                                                                                                                                                                                                                                                                                                                                                                                                                        |         |
| #                                                | Searches                                                                                                                                                                                                                                                                                                                                                                                                                                                                                                                                                                                                                                                                                                                                                                                                                                                                                                                                                                                                                                                                                                                                                                                                                                                                                                                                                                               | Results |
| 1                                                | (clerkship* or preceptorship* or traineeship* or placement* or exposure* or practicum* or "off service" or fieldwork or "field-work" or "field training" or "field study" or "field studies" or "field education" or "field experience" or "workplace learn*" or "workplace training" or "practice learn*" or "practice based learn*" or "practical learn*" or "experiential learn*" or "experiential education" or "work based learn*" or "work integrated learn*" or "service learning" or "deliberate practice" or rotation or rotations or "clinical practice" or "clinical environment*" or "clinical setting*" or "clinical education" or "co-op" or "cooperative education" or "collaborative learning").mp.                                                                                                                                                                                                                                                                                                                                                                                                                                                                                                                                                                                                                                                                    | 1777873 |
| 2                                                | Interdisciplinary Placement/                                                                                                                                                                                                                                                                                                                                                                                                                                                                                                                                                                                                                                                                                                                                                                                                                                                                                                                                                                                                                                                                                                                                                                                                                                                                                                                                                           | 305     |
| 3                                                | Clinical Clerkship/                                                                                                                                                                                                                                                                                                                                                                                                                                                                                                                                                                                                                                                                                                                                                                                                                                                                                                                                                                                                                                                                                                                                                                                                                                                                                                                                                                    | 5743    |
| 4                                                | Preceptorship/                                                                                                                                                                                                                                                                                                                                                                                                                                                                                                                                                                                                                                                                                                                                                                                                                                                                                                                                                                                                                                                                                                                                                                                                                                                                                                                                                                         | 5616    |
| 5                                                | or/1-4 [Practicum Concept]                                                                                                                                                                                                                                                                                                                                                                                                                                                                                                                                                                                                                                                                                                                                                                                                                                                                                                                                                                                                                                                                                                                                                                                                                                                                                                                                                             | 1777873 |
| 6                                                | (interprofession* or "inter-profession*" or interdisciplin* or "inter-disciplin*" or interinstitut* or "inter-institut*" or interagenc* or "inter-agenc*" or intersector* or "inter-sector*" or interdepartment* or "inter-department*" or interoccupation* or "inter-occupation*" or interorgani?ation* or "inter-organi?ation*" or multiprofession* or "multi-profession*" or multidisciplin* or "multi-disciplin*" or multiinstitut* or "multi-institut*" or multiagenc* or "multi-agenc*" or multisector* or "multi-sector*" or multidepartment* or "multi-department*" or multioccupation* or "multi-occupation*" or multiorgani?ation* or "multi-organi?ation*" or transprofession* or "trans-profession*" or transdisciplin* or "trans-disciplin*" or transagenc* or "trans-agenc*" or transsector* or "trans-sector*" or transdepartment* or "trans-department*" or transoccupation* or "trans-occupation*" or transorgani?ation* or "transorgani?ation*" or "cross-training" or crossprofession* or "cross-profession*" or crossdisciplin* or "cross-disciplin*" or crossinstitut* or "cross-institut*" or crossagenc* or "cross-agenc*" or crosssector* or "cross-sector*" or crossdepartment* or "cross-department*" or crossoccupation* or "cross-occupation*" or crossorgani?ation* or "cross-organi?ation*" or team* or collaborative or IPP or IPE or ILP or IPECP).mp. | 552683  |
| 7                                                | interprofession*.jw.                                                                                                                                                                                                                                                                                                                                                                                                                                                                                                                                                                                                                                                                                                                                                                                                                                                                                                                                                                                                                                                                                                                                                                                                                                                                                                                                                                   | 2316    |

|    |                                                                                                                                                                                                                                                                                        |        |
|----|----------------------------------------------------------------------------------------------------------------------------------------------------------------------------------------------------------------------------------------------------------------------------------------|--------|
| 8  | Interprofessional Relations/                                                                                                                                                                                                                                                           | 53342  |
| 9  | Interprofessional Education/                                                                                                                                                                                                                                                           | 459    |
| 10 | exp Patient Care Team/                                                                                                                                                                                                                                                                 | 72815  |
| 11 | or/6-10 [Interprofessional Concept]                                                                                                                                                                                                                                                    | 552818 |
| 12 | ((primary or ambulatory or communit* or general or family) adj2 (care or healthcare or "health care" or "health program*" or "health centre*" or "health center*" or "health service*" or practice* or clinic* or practition* or medicine or doctor* or physician* or clinician*)).mp. | 548437 |
| 13 | ("private pract*" or GP or PCP or CBHW).mp.                                                                                                                                                                                                                                            | 82406  |
| 14 | (community or "general practice*" or "general practitioner*" or "family practic*" or "family medicine" or "primary care").jw.                                                                                                                                                          | 121047 |
| 15 | Community Health Services/                                                                                                                                                                                                                                                             | 33119  |
| 16 | Community Medicine/                                                                                                                                                                                                                                                                    | 2078   |
| 17 | Primary Health Care/                                                                                                                                                                                                                                                                   | 91529  |
| 18 | General practice/ or Family practice/                                                                                                                                                                                                                                                  | 78544  |
| 19 | Private Practice/                                                                                                                                                                                                                                                                      | 8502   |
| 20 | exp Ambulatory Care Facilities/                                                                                                                                                                                                                                                        | 59177  |
| 31 | limit 30 to (yr="2001 -Current" and english) [FINAL set; with limits applied]                                                                                                                                                                                                          | 1588   |

**Table 2. CINAHL**

| Database: CINAHL with Full-text |                                                                                                                                                                                                                                                                                                                                                                                                                                                                                                                                                                                                                                                                                                                 |         |
|---------------------------------|-----------------------------------------------------------------------------------------------------------------------------------------------------------------------------------------------------------------------------------------------------------------------------------------------------------------------------------------------------------------------------------------------------------------------------------------------------------------------------------------------------------------------------------------------------------------------------------------------------------------------------------------------------------------------------------------------------------------|---------|
| Platform: EbscoHost             |                                                                                                                                                                                                                                                                                                                                                                                                                                                                                                                                                                                                                                                                                                                 |         |
| Date Searched: Jul 11, 2023     |                                                                                                                                                                                                                                                                                                                                                                                                                                                                                                                                                                                                                                                                                                                 |         |
| #                               | Searches                                                                                                                                                                                                                                                                                                                                                                                                                                                                                                                                                                                                                                                                                                        | Results |
| S1                              | (clerkship* or preceptorship* or traineeship* or placement* or exposure* or practicum* or "off service" or fieldwork or "field-work" or "field training" or "field study" or "field studies" or "field education" or "field experience" or "workplace learn*" or "workplace training" or "practice learn*" or "practice based learn*" or "practical learn*" or "experiential learn*" or "experiential education" or "work based learn*" or "work integrated learn*" or "service learning" or "deliberate practice" or rotation or rotations or "clinical practice" or "clinical environment*" or "clinical setting*" or "clinical education" or "co-op" or "cooperative education" or "collaborative learning") | 413,434 |
| S2                              | (MH "Student Placement")                                                                                                                                                                                                                                                                                                                                                                                                                                                                                                                                                                                                                                                                                        | 5,573   |
| S3                              | (MH "Education, Clinical") OR (MH "Fieldwork")                                                                                                                                                                                                                                                                                                                                                                                                                                                                                                                                                                                                                                                                  | 15,370  |
| S4                              | (MH "Preceptorship")                                                                                                                                                                                                                                                                                                                                                                                                                                                                                                                                                                                                                                                                                            | 4,909   |
| S5                              | S1 OR S2 OR S3 OR S4                                                                                                                                                                                                                                                                                                                                                                                                                                                                                                                                                                                                                                                                                            | 416,008 |
| S6                              | (interprofession* or "inter-profession*" or interdisciplin* or "inter-disciplin*" or interinstitut* or "inter-institut*" or interagenc* or "inter-                                                                                                                                                                                                                                                                                                                                                                                                                                                                                                                                                              | 285,457 |

|     |                                                                                                                                                                                                                                                                                                                                                                                                                                                                                                                                                                                                                                                                                                                                                                                                                                                                                                                                                                                                                                                                                                                                                                                                                                  |         |
|-----|----------------------------------------------------------------------------------------------------------------------------------------------------------------------------------------------------------------------------------------------------------------------------------------------------------------------------------------------------------------------------------------------------------------------------------------------------------------------------------------------------------------------------------------------------------------------------------------------------------------------------------------------------------------------------------------------------------------------------------------------------------------------------------------------------------------------------------------------------------------------------------------------------------------------------------------------------------------------------------------------------------------------------------------------------------------------------------------------------------------------------------------------------------------------------------------------------------------------------------|---------|
|     | agenc*" or intersector* or "inter-sector*" or interdepartment* or "inter-department*" or interoccupation* or "inter-occupation*" or interorgani?ation* or "inter-organi?ation*" or multiprofession* or "multi-profession*" or multidisciplin* or "multi-disciplin*" or multiinstitut* or "multi-institut*" or multiagenc* or "multi-agenc*" or multisector* or "multi-sector*" or multidepartment* or "multi-department*" or multioccupation* or "multi-occupation*" or multiorgani?ation* or "multi-organi?ation*" or transprofession* or "trans-profession*" or transdisciplin* or "trans-disciplin*" or transagenc* or "trans-agenc*" or transsector* or "trans-sector*" or transdepartment* or "trans-department*" or transoccupation* or "trans-occupation*" or transorgani?ation* or "transorgani?ation*" or "cross-training" or crossprofession* or "cross-profession*" or crossdisciplin* or "cross-disciplin*" or crossinstitut* or "cross-institut*" or crossagenc* or "cross-agenc*" or crosssector* or "cross-sector*" or crossdepartment* or "cross-department*" or crossoccupation* or "cross-occupation*" or crossorgani?ation* or "cross-organi?ation*" or team* or collaborative or IPP or IPE or ILP or IPECP) |         |
| S7  | (MH "Interprofessional Relations")                                                                                                                                                                                                                                                                                                                                                                                                                                                                                                                                                                                                                                                                                                                                                                                                                                                                                                                                                                                                                                                                                                                                                                                               | 28,642  |
| S8  | (MH "Education, Interdisciplinary")                                                                                                                                                                                                                                                                                                                                                                                                                                                                                                                                                                                                                                                                                                                                                                                                                                                                                                                                                                                                                                                                                                                                                                                              | 7,049   |
| S9  | (MH "Multidisciplinary Care Team")                                                                                                                                                                                                                                                                                                                                                                                                                                                                                                                                                                                                                                                                                                                                                                                                                                                                                                                                                                                                                                                                                                                                                                                               | 50,261  |
| S10 | S6 OR S7 OR S8 OR S9                                                                                                                                                                                                                                                                                                                                                                                                                                                                                                                                                                                                                                                                                                                                                                                                                                                                                                                                                                                                                                                                                                                                                                                                             | 285,457 |
| S11 | ((primary or ambulatory or communit* or general or family) N2 (care or healthcare or "health care" or "health program*" or "health centre*" or "health center*" or "health service*" or practice* or clinic* or practition* or medicine or doctor* or physician* or clinician*))                                                                                                                                                                                                                                                                                                                                                                                                                                                                                                                                                                                                                                                                                                                                                                                                                                                                                                                                                 | 321,655 |
| S12 | ("private pract*" or GP or PCP or CBHW)                                                                                                                                                                                                                                                                                                                                                                                                                                                                                                                                                                                                                                                                                                                                                                                                                                                                                                                                                                                                                                                                                                                                                                                          | 57,766  |
| S13 | (MH "Community Health Services")                                                                                                                                                                                                                                                                                                                                                                                                                                                                                                                                                                                                                                                                                                                                                                                                                                                                                                                                                                                                                                                                                                                                                                                                 | 24,548  |
| S14 | (MH "Community Medicine")                                                                                                                                                                                                                                                                                                                                                                                                                                                                                                                                                                                                                                                                                                                                                                                                                                                                                                                                                                                                                                                                                                                                                                                                        | 349     |
| S15 | (MH "Primary Health Care")                                                                                                                                                                                                                                                                                                                                                                                                                                                                                                                                                                                                                                                                                                                                                                                                                                                                                                                                                                                                                                                                                                                                                                                                       | 72,202  |
| S16 | (MH "Family Practice")                                                                                                                                                                                                                                                                                                                                                                                                                                                                                                                                                                                                                                                                                                                                                                                                                                                                                                                                                                                                                                                                                                                                                                                                           | 26,195  |
| S17 | (MH "Private Practice")                                                                                                                                                                                                                                                                                                                                                                                                                                                                                                                                                                                                                                                                                                                                                                                                                                                                                                                                                                                                                                                                                                                                                                                                          | 9,055   |
| S18 | (MH "Ambulatory Care Facilities")                                                                                                                                                                                                                                                                                                                                                                                                                                                                                                                                                                                                                                                                                                                                                                                                                                                                                                                                                                                                                                                                                                                                                                                                | 9,173   |
| S19 | (MH "Ambulatory Care")                                                                                                                                                                                                                                                                                                                                                                                                                                                                                                                                                                                                                                                                                                                                                                                                                                                                                                                                                                                                                                                                                                                                                                                                           | 13,368  |
| S20 | (MH "Physicians, Family")                                                                                                                                                                                                                                                                                                                                                                                                                                                                                                                                                                                                                                                                                                                                                                                                                                                                                                                                                                                                                                                                                                                                                                                                        | 22,866  |
| S21 | (MH "Community Health Nursing")                                                                                                                                                                                                                                                                                                                                                                                                                                                                                                                                                                                                                                                                                                                                                                                                                                                                                                                                                                                                                                                                                                                                                                                                  | 26,791  |
| S22 | S11 OR S12 OR S13 OR S14 OR S15 OR S16 OR S17 OR S18 OR S19 OR S20 OR S21                                                                                                                                                                                                                                                                                                                                                                                                                                                                                                                                                                                                                                                                                                                                                                                                                                                                                                                                                                                                                                                                                                                                                        | 373,036 |
| S23 | (student* or learner* or resident or residents or intern or interns or PGY or graduate* or postgraduate* or "post-grad*" or undergraduate* or "under-grad*" or trainee*)                                                                                                                                                                                                                                                                                                                                                                                                                                                                                                                                                                                                                                                                                                                                                                                                                                                                                                                                                                                                                                                         | 396,972 |
| S24 | (MH "Students, Health Occupations+")                                                                                                                                                                                                                                                                                                                                                                                                                                                                                                                                                                                                                                                                                                                                                                                                                                                                                                                                                                                                                                                                                                                                                                                             | 91,435  |

|     |                                                                                                                                                                                                                                                                                             |         |
|-----|---------------------------------------------------------------------------------------------------------------------------------------------------------------------------------------------------------------------------------------------------------------------------------------------|---------|
| S25 | (MH "Education, Dental") OR (MH "Education, Nursing, Graduate") OR (MH "Education, Medical") OR (MH "Education, Nursing, Baccalaureate+") OR (MH "Education, Nursing") OR (MH "Education, Nursing, Associate") OR (MH "Education, Nursing, Diploma Programs") OR (MH "Education, Pharmacy") | 102,625 |
| S26 | S23 OR S24 OR S25                                                                                                                                                                                                                                                                           | 444,310 |
| S27 | S5 AND S10 AND S22 AND S26                                                                                                                                                                                                                                                                  | 1,372   |
| S28 | S5 AND S10 AND S22 AND S26 [limit to english]                                                                                                                                                                                                                                               | 1,331   |
| S29 | S5 AND S10 AND S22 AND S26 [limit 2001 - present]                                                                                                                                                                                                                                           | 1,224   |

**Table 3. EMBASE**

| Database: Embase <1974 to 2023 July 10> |                                                                                                                                                                                                                                                                                                                                                                                                                                                                                                                                                                                                                                                                                                                                                                                                                                                                                                                                                                                          |         |
|-----------------------------------------|------------------------------------------------------------------------------------------------------------------------------------------------------------------------------------------------------------------------------------------------------------------------------------------------------------------------------------------------------------------------------------------------------------------------------------------------------------------------------------------------------------------------------------------------------------------------------------------------------------------------------------------------------------------------------------------------------------------------------------------------------------------------------------------------------------------------------------------------------------------------------------------------------------------------------------------------------------------------------------------|---------|
| Platform: OVID                          |                                                                                                                                                                                                                                                                                                                                                                                                                                                                                                                                                                                                                                                                                                                                                                                                                                                                                                                                                                                          |         |
| Date Searched: Jul 11, 2023             |                                                                                                                                                                                                                                                                                                                                                                                                                                                                                                                                                                                                                                                                                                                                                                                                                                                                                                                                                                                          |         |
| #                                       | Searches                                                                                                                                                                                                                                                                                                                                                                                                                                                                                                                                                                                                                                                                                                                                                                                                                                                                                                                                                                                 | Results |
| 1                                       | (clerkship* or preceptorship* or traineeship* or placement* or exposure* or practicum* or "off service" or fieldwork or "field-work" or "field training" or "field study" or "field studies" or "field education" or "field experience" or "workplace learn*" or "workplace training" or "practice learn*" or "practice based learn*" or "practical learn*" or "experiential learn*" or "experiential education" or "work based learn*" or "work integrated learn*" or "service learning" or "deliberate practice" or rotation or rotations or "clinical practice" or "clinical environment*" or "clinical setting*" or "clinical education" or "co-op" or "cooperative education" or "collaborative learning").mp.                                                                                                                                                                                                                                                                      | 2661821 |
| 2                                       | collaborative learning/                                                                                                                                                                                                                                                                                                                                                                                                                                                                                                                                                                                                                                                                                                                                                                                                                                                                                                                                                                  | 1895    |
| 3                                       | clinical education/                                                                                                                                                                                                                                                                                                                                                                                                                                                                                                                                                                                                                                                                                                                                                                                                                                                                                                                                                                      | 15430   |
| 4                                       | or/1-3 [Practicum Concept]                                                                                                                                                                                                                                                                                                                                                                                                                                                                                                                                                                                                                                                                                                                                                                                                                                                                                                                                                               | 2661821 |
| 5                                       | (interprofession* or "inter-profession*" or interdisciplin* or "inter-disciplin*" or interinstitut* or "inter-institut*" or interagenc* or "inter-agenc*" or intersector* or "inter-sector*" or interdepartment* or "inter-department*" or interoccupation* or "inter-occupation*" or interorgani?ation* or "inter-organi?ation*" or multiprofession* or "multi-profession*" or multidisciplin* or "multi-disciplin*" or multiinstitut* or "multi-institut*" or multiagenc* or "multi-agenc*" or multisector* or "multi-sector*" or multidepartment* or "multi-department*" or multioccupation* or "multi-occupation*" or multiorgani?ation* or "multi-organi?ation*" or transprofession* or "trans-profession*" or transdisciplin* or "trans-disciplin*" or transagenc* or "trans-agenc*" or transsector* or "trans-sector*" or transdepartment* or "trans-department*" or transoccupation* or "trans-occupation*" or transorgani?ation* or "transorgani?ation*" or "cross-training" or | 720010  |

|    |                                                                                                                                                                                                                                                                                                                                                                                               |         |
|----|-----------------------------------------------------------------------------------------------------------------------------------------------------------------------------------------------------------------------------------------------------------------------------------------------------------------------------------------------------------------------------------------------|---------|
|    | crossprofession* or "cross-profession*" or crossdisciplin* or "cross-disciplin*" or crossinstitut* or "cross-institut*" or crossagenc* or "cross-agenc*" or crosssector* or "cross-sector*" or crossdepartment* or "cross-department*" or crossoccupation* or "cross-occupation*" or crossorgani?ation* or "cross-organi?ation*" or team* or collaborative or IPP or IPE or ILP or IPECP).mp. |         |
| 6  | interprofession*.jx.                                                                                                                                                                                                                                                                                                                                                                          | 2471    |
| 7  | interprofessional education/                                                                                                                                                                                                                                                                                                                                                                  | 926     |
| 8  | multidisciplinary team/ or collaborative care team/                                                                                                                                                                                                                                                                                                                                           | 28724   |
| 9  | or/5-8 [Interprofessional Concept]                                                                                                                                                                                                                                                                                                                                                            | 720198  |
| 10 | ((primary or ambulatory or communit* or general or family) adj2 (care or healthcare or "health care" or "health program*" or "health centre*" or "health center*" or "health service*" or practice* or clinic* or practition* or medicine or doctor* or physician* or clinician*)).mp.                                                                                                        | 710177  |
| 11 | ("private pract*" or GP or PCP or CBHW).mp.                                                                                                                                                                                                                                                                                                                                                   | 146483  |
| 12 | (community or "general practice*" or "general practitioner*" or "family practic*" or "family medicine" or "primary care").jx.                                                                                                                                                                                                                                                                 | 120331  |
| 13 | community care/                                                                                                                                                                                                                                                                                                                                                                               | 60271   |
| 14 | community medicine/                                                                                                                                                                                                                                                                                                                                                                           | 3017    |
| 15 | primary health care/ or primary medical care/                                                                                                                                                                                                                                                                                                                                                 | 209522  |
| 16 | general practice/                                                                                                                                                                                                                                                                                                                                                                             | 85187   |
| 17 | private practice/                                                                                                                                                                                                                                                                                                                                                                             | 18134   |
| 18 | ambulatory care/ or ambulatory care nursing/                                                                                                                                                                                                                                                                                                                                                  | 41745   |
| 19 | general practitioner/                                                                                                                                                                                                                                                                                                                                                                         | 118696  |
| 20 | community health nursing/                                                                                                                                                                                                                                                                                                                                                                     | 24217   |
| 21 | or/10-20 [Primary Care Concept]                                                                                                                                                                                                                                                                                                                                                               | 905886  |
| 22 | (student* or learner* or resident or residents or intern or interns or PGY or graduate* or postgraduate* or "post-grad*" or undergraduate* or "under-grad*" or trainee*).mp.                                                                                                                                                                                                                  | 973077  |
| 23 | exp health student/                                                                                                                                                                                                                                                                                                                                                                           | 141107  |
| 24 | medical education/ or dental education/ or physician assistant education/ or residency education/ or nursing education/ or nurse midwifery education/ or nurse training/ or pharmacy education/                                                                                                                                                                                               | 383969  |
| 25 | or/22-24 [Student Concept]                                                                                                                                                                                                                                                                                                                                                                    | 1199033 |
| 26 | and/4,9,21,25 [FINAL SET; no limits]                                                                                                                                                                                                                                                                                                                                                          | 3334    |
| 27 | limit 26 to (english language and yr="2001 -Current") [FINAL Set; with limits applied]                                                                                                                                                                                                                                                                                                        | 3038    |

**Table 4. ERIC**

| Database: ERIC<br>Platform: ProQuest<br>Date Searched: Jul 11, 2023 |                                                                                                                                                                                                                                                                                                                                                                                                                                                                                                                                                                                                                                                                                                                                                                                                                                                                                                                                                                                                                                                                                                                                                                                                                                                                                                                                                                                    |         |
|---------------------------------------------------------------------|------------------------------------------------------------------------------------------------------------------------------------------------------------------------------------------------------------------------------------------------------------------------------------------------------------------------------------------------------------------------------------------------------------------------------------------------------------------------------------------------------------------------------------------------------------------------------------------------------------------------------------------------------------------------------------------------------------------------------------------------------------------------------------------------------------------------------------------------------------------------------------------------------------------------------------------------------------------------------------------------------------------------------------------------------------------------------------------------------------------------------------------------------------------------------------------------------------------------------------------------------------------------------------------------------------------------------------------------------------------------------------|---------|
| #                                                                   | Searches                                                                                                                                                                                                                                                                                                                                                                                                                                                                                                                                                                                                                                                                                                                                                                                                                                                                                                                                                                                                                                                                                                                                                                                                                                                                                                                                                                           | Results |
| S1                                                                  | (clerkship* or preceptorship* or traineeship* or placement* or exposure* or practicum* or "off service" or fieldwork or "field-work" or "field training" or "field study" or "field studies" or "field education" or "field experience" or ("workplace learning") or "workplace training" or ("practice learning") or "practice based learn*" or ("practical learning") or ("experiential learning") or "experiential education" or "work based learn*" or "work integrated learn*" or "service learning" or "deliberate practice" or rotation or rotations or "clinical practice" or ("clinical environment" OR "clinical environments") or ("clinical setting" OR "clinical settings") or "clinical education" or "co-op" or "cooperative education" or "collaborative learning")                                                                                                                                                                                                                                                                                                                                                                                                                                                                                                                                                                                                | 109504  |
| S2                                                                  | MAINSUBJECT.EXACT("Adult Vocational Education") OR<br>MAINSUBJECT.EXACT("Cooperative Education")                                                                                                                                                                                                                                                                                                                                                                                                                                                                                                                                                                                                                                                                                                                                                                                                                                                                                                                                                                                                                                                                                                                                                                                                                                                                                   | 4760    |
| S3                                                                  | MAINSUBJECT.EXACT("Clinical Experience") OR<br>MAINSUBJECT.EXACT("Clinical Teaching (Health Professions)") OR<br>MAINSUBJECT.EXACT("Internship Programs") OR<br>MAINSUBJECT.EXACT("Practicums") OR<br>MAINSUBJECT.EXACT("Service Learning")                                                                                                                                                                                                                                                                                                                                                                                                                                                                                                                                                                                                                                                                                                                                                                                                                                                                                                                                                                                                                                                                                                                                        | 17544   |
| S4                                                                  | 1 or 2 or 3                                                                                                                                                                                                                                                                                                                                                                                                                                                                                                                                                                                                                                                                                                                                                                                                                                                                                                                                                                                                                                                                                                                                                                                                                                                                                                                                                                        | 116376  |
| S5                                                                  | (interprofession* or "inter-profession*" or interdisciplin* or "inter-disciplin*" or interinstitut* or "inter-institut*" or interagenc* or "inter-agenc*" or intersector* or "inter-sector*" or interdepartment* or "inter-department*" or interoccupation* or "inter-occupation*" or interorgani?ation* or "inter-organi?ation*" or multiprofession* or "multi-profession*" or multidisciplin* or "multi-disciplin*" or multiinstitut* or "multi-institut*" or multiagenc* or "multi-agenc*" or multisector* or "multi-sector*" or multidepartment* or "multi-department*" or multioccupation* or "multi-occupation*" or multiorgani?ation* or "multi-organi?ation*" or transprofession* or "trans-profession*" or transdisciplin* or "trans-disciplin*" or transagenc* or "trans-agenc*" or transsector* or "trans-sector*" or transdepartment* or "trans-department*" or transoccupation* or "trans-occupation*" or transorgani?ation* or "transorgani?ation*" or "cross-training" or crossprofession* or "cross-profession*" or crossdisciplin* or "cross-disciplin*" or crossinstitut* or "cross-institut*" or crossagenc* or "cross-agenc*" or crosssector* or "cross-sector*" or crossdepartment* or "cross-department*" or crossoccupation* or "cross-occupation*" or crossorgani?ation* or "cross-organi?ation*" or team* or collaborative or IPP or IPE or ILP or IPECP) | 128625  |

|     |                                                                                                                                                                                                                                                                                                                                                                                                                      |        |
|-----|----------------------------------------------------------------------------------------------------------------------------------------------------------------------------------------------------------------------------------------------------------------------------------------------------------------------------------------------------------------------------------------------------------------------|--------|
| S6  | PUB(interprofession*)                                                                                                                                                                                                                                                                                                                                                                                                | 11     |
| S7  | MAINSUBJECT.EXACT("Interprofessional Relationship")                                                                                                                                                                                                                                                                                                                                                                  | 4134   |
| S8  | 5 or 6 or 7                                                                                                                                                                                                                                                                                                                                                                                                          | 128625 |
| S9  | ((primary or ambulatory or communit* or general or family) N/2 (care or healthcare or "health care" or ("health program" OR "health programme" OR "health programmes" OR "health programs") or ("health centre" OR "health centres") or ("health center" OR "health centers") or ("health service" OR "health services") or practice* or clinic* or practition* or medicine or doctor* or physician* or clinician*)) | 27052  |
| S10 | (("private practice" OR "private practices" OR "private practise" OR "private practitioner" OR "private practitioners") or GP or PCP or CBHW)                                                                                                                                                                                                                                                                        | 637    |
| S11 | PUB(community or "general practice*" or "general practitioner*" or "family practic*" or "family medicine" or "primary care")                                                                                                                                                                                                                                                                                         | 14839  |
| S12 | MAINSUBJECT.EXACT("Community Health Services")                                                                                                                                                                                                                                                                                                                                                                       | 1526   |
| S13 | MAINSUBJECT.EXACT("Primary Health Care")                                                                                                                                                                                                                                                                                                                                                                             | 1363   |
| S14 | MAINSUBJECT.EXACT("Family Practice (Medicine)")                                                                                                                                                                                                                                                                                                                                                                      | 610    |
| S15 | 9 or 10 or 11 or 12 or 13 or 14                                                                                                                                                                                                                                                                                                                                                                                      | 41719  |
| S16 | (student* or learner* or resident or residents or intern or interns or PGY or graduate* or postgraduate* or "post-grad*" or undergraduate* or "under-grad*" or trainee*)                                                                                                                                                                                                                                             | 983344 |
| S17 | MAINSUBJECT.EXACT("Medical Students") OR<br>MAINSUBJECT.EXACT("Nursing Students")                                                                                                                                                                                                                                                                                                                                    | 6164   |
| S18 | MAINSUBJECT.EXACT("Medical Education") OR<br>MAINSUBJECT.EXACT("Graduate Medical Education") OR<br>MAINSUBJECT.EXACT("Nursing Education") OR<br>MAINSUBJECT.EXACT("Pharmaceutical Education")                                                                                                                                                                                                                        | 17487  |
| S19 | 16 or 17 or 18                                                                                                                                                                                                                                                                                                                                                                                                       | 988590 |
| S20 | 4 and 8 and 15 and 19                                                                                                                                                                                                                                                                                                                                                                                                | 702    |
| S21 | 20 (limit to 2001- present)                                                                                                                                                                                                                                                                                                                                                                                          | 568    |
| S22 | 21 (limit to english)                                                                                                                                                                                                                                                                                                                                                                                                | 568    |

**Table 5. PsycInfo**

| Database: APA PsycInfo <1806 to July Week 1 2023> |                                                                                                                                                                                                                                                                                                    |         |
|---------------------------------------------------|----------------------------------------------------------------------------------------------------------------------------------------------------------------------------------------------------------------------------------------------------------------------------------------------------|---------|
| Platform: OVID                                    |                                                                                                                                                                                                                                                                                                    |         |
| Date Searched: Jul 11, 2023                       |                                                                                                                                                                                                                                                                                                    |         |
| #                                                 | Searches                                                                                                                                                                                                                                                                                           | Results |
| 1                                                 | (clerkship* or preceptorship* or traineeship* or placement* or exposure* or practicum* or "off service" or fieldwork or "field-work" or "field training" or "field study" or "field studies" or "field education" or "field experience" or "workplace learn*" or "workplace training" or "practice | 337628  |

|    |                                                                                                                                                                                                                                                                                                                                                                                                                                                                                                                                                                                                                                                                                                                                                                                                                                                                                                                                                                                                                                                                                                                                                                                                                                                                                                                                                                                        |        |
|----|----------------------------------------------------------------------------------------------------------------------------------------------------------------------------------------------------------------------------------------------------------------------------------------------------------------------------------------------------------------------------------------------------------------------------------------------------------------------------------------------------------------------------------------------------------------------------------------------------------------------------------------------------------------------------------------------------------------------------------------------------------------------------------------------------------------------------------------------------------------------------------------------------------------------------------------------------------------------------------------------------------------------------------------------------------------------------------------------------------------------------------------------------------------------------------------------------------------------------------------------------------------------------------------------------------------------------------------------------------------------------------------|--------|
|    | learn*" or "practice based learn*" or "practical learn*" or "experiential learn*" or "experiential education" or "work based learn*" or "work integrated learn*" or "service learning" or "deliberate practice" or rotation or rotations or "clinical practice" or "clinical environment*" or "clinical setting*" or "clinical education" or "co-op" or "cooperative education" or "collaborative learning").mp.                                                                                                                                                                                                                                                                                                                                                                                                                                                                                                                                                                                                                                                                                                                                                                                                                                                                                                                                                                       |        |
| 2  | exp experiential learning/                                                                                                                                                                                                                                                                                                                                                                                                                                                                                                                                                                                                                                                                                                                                                                                                                                                                                                                                                                                                                                                                                                                                                                                                                                                                                                                                                             | 7408   |
| 3  | cooperative education/                                                                                                                                                                                                                                                                                                                                                                                                                                                                                                                                                                                                                                                                                                                                                                                                                                                                                                                                                                                                                                                                                                                                                                                                                                                                                                                                                                 | 232    |
| 4  | or/1-3 [Practicum Concept]                                                                                                                                                                                                                                                                                                                                                                                                                                                                                                                                                                                                                                                                                                                                                                                                                                                                                                                                                                                                                                                                                                                                                                                                                                                                                                                                                             | 339206 |
| 5  | (interprofession* or "inter-profession*" or interdisciplin* or "inter-disciplin*" or interinstitut* or "inter-institut*" or interagenc* or "inter-agenc*" or intersector* or "inter-sector*" or interdepartment* or "inter-department*" or interoccupation* or "inter-occupation*" or interorgani?ation* or "inter-organi?ation*" or multiprofession* or "multi-profession*" or multidisciplin* or "multi-disciplin*" or multiinstitut* or "multi-institut*" or multiagenc* or "multi-agenc*" or multisector* or "multi-sector*" or multidepartment* or "multi-department*" or multioccupation* or "multi-occupation*" or multiorgani?ation* or "multi-organi?ation*" or transprofession* or "trans-profession*" or transdisciplin* or "trans-disciplin*" or transagenc* or "trans-agenc*" or transsector* or "trans-sector*" or transdepartment* or "trans-department*" or transoccupation* or "trans-occupation*" or transorgani?ation* or "transorgani?ation*" or "cross-training" or crossprofession* or "cross-profession*" or crossdisciplin* or "cross-disciplin*" or crossinstitut* or "cross-institut*" or crossagenc* or "cross-agenc*" or crosssector* or "cross-sector*" or crossdepartment* or "cross-department*" or crossoccupation* or "cross-occupation*" or crossorgani?ation* or "cross-organi?ation*" or team* or collaborative or IPP or IPE or ILP or IPECP).mp. | 202711 |
| 6  | interprofession*.jx.                                                                                                                                                                                                                                                                                                                                                                                                                                                                                                                                                                                                                                                                                                                                                                                                                                                                                                                                                                                                                                                                                                                                                                                                                                                                                                                                                                   | 1726   |
| 7  | or/5-6 [Interprofessional Concept]                                                                                                                                                                                                                                                                                                                                                                                                                                                                                                                                                                                                                                                                                                                                                                                                                                                                                                                                                                                                                                                                                                                                                                                                                                                                                                                                                     | 202803 |
| 8  | ((primary or ambulatory or communit* or general or family) adj2 (care or healthcare or "health care" or "health program*" or "health centre*" or "health center*" or "health service*" or practice* or clinic* or practition* or medicine or doctor* or physician* or clinician*)).mp.                                                                                                                                                                                                                                                                                                                                                                                                                                                                                                                                                                                                                                                                                                                                                                                                                                                                                                                                                                                                                                                                                                 | 134060 |
| 9  | ("private pract*" or GP or PCP or CBHW).mp.                                                                                                                                                                                                                                                                                                                                                                                                                                                                                                                                                                                                                                                                                                                                                                                                                                                                                                                                                                                                                                                                                                                                                                                                                                                                                                                                            | 12698  |
| 10 | (community or "general practice*" or "general practitioner*" or "family practic*" or "family medicine" or "primary care").jx.                                                                                                                                                                                                                                                                                                                                                                                                                                                                                                                                                                                                                                                                                                                                                                                                                                                                                                                                                                                                                                                                                                                                                                                                                                                          | 32071  |
| 11 | community services/                                                                                                                                                                                                                                                                                                                                                                                                                                                                                                                                                                                                                                                                                                                                                                                                                                                                                                                                                                                                                                                                                                                                                                                                                                                                                                                                                                    | 18154  |
| 12 | primary health care/                                                                                                                                                                                                                                                                                                                                                                                                                                                                                                                                                                                                                                                                                                                                                                                                                                                                                                                                                                                                                                                                                                                                                                                                                                                                                                                                                                   | 21252  |
| 13 | Private Practice/                                                                                                                                                                                                                                                                                                                                                                                                                                                                                                                                                                                                                                                                                                                                                                                                                                                                                                                                                                                                                                                                                                                                                                                                                                                                                                                                                                      | 1599   |
| 14 | Family Physicians/                                                                                                                                                                                                                                                                                                                                                                                                                                                                                                                                                                                                                                                                                                                                                                                                                                                                                                                                                                                                                                                                                                                                                                                                                                                                                                                                                                     | 1632   |
| 15 | General Practitioners/                                                                                                                                                                                                                                                                                                                                                                                                                                                                                                                                                                                                                                                                                                                                                                                                                                                                                                                                                                                                                                                                                                                                                                                                                                                                                                                                                                 | 6367   |
| 16 | or/8-15 [Primary Care Concept]                                                                                                                                                                                                                                                                                                                                                                                                                                                                                                                                                                                                                                                                                                                                                                                                                                                                                                                                                                                                                                                                                                                                                                                                                                                                                                                                                         | 177738 |



|    |                                                                                                                                                                              |        |
|----|------------------------------------------------------------------------------------------------------------------------------------------------------------------------------|--------|
| 17 | (student* or learner* or resident or residents or intern or interns or PGY or graduate* or postgraduate* or "post-grad*" or undergraduate* or "under-grad*" or trainee*).mp. | 863032 |
| 18 | medical residency/ or medical students/ or medical education/ or medical internship/ or dental education/ or dental students/ or nursing education/ or nursing students/     | 42394  |
| 19 | or/17-18 [Student Concept]                                                                                                                                                   | 870454 |
| 20 | and/4,7,16,19 [FINAL set; no limits]                                                                                                                                         | 864    |
| 21 | limit 20 to (english language and yr="2001 -Current") [FINAL set; with limits applied]                                                                                       | 746    |

**Table 6. Scopus**

| Database: Scopus            |                                                                                                                                                                                                                                                                                                                                                                                                                                                                                                                                                                                                                                                                                                                                                                                                                                                                                                                                                                                                                                                                               |           |
|-----------------------------|-------------------------------------------------------------------------------------------------------------------------------------------------------------------------------------------------------------------------------------------------------------------------------------------------------------------------------------------------------------------------------------------------------------------------------------------------------------------------------------------------------------------------------------------------------------------------------------------------------------------------------------------------------------------------------------------------------------------------------------------------------------------------------------------------------------------------------------------------------------------------------------------------------------------------------------------------------------------------------------------------------------------------------------------------------------------------------|-----------|
| Platform:                   |                                                                                                                                                                                                                                                                                                                                                                                                                                                                                                                                                                                                                                                                                                                                                                                                                                                                                                                                                                                                                                                                               |           |
| Date Searched: Jul 11, 2023 |                                                                                                                                                                                                                                                                                                                                                                                                                                                                                                                                                                                                                                                                                                                                                                                                                                                                                                                                                                                                                                                                               |           |
| #                           | Searches                                                                                                                                                                                                                                                                                                                                                                                                                                                                                                                                                                                                                                                                                                                                                                                                                                                                                                                                                                                                                                                                      | Results   |
| 1                           | TITLE-ABS-KEY ( clerkship* OR preceptorship* OR traineeship* OR placement* OR exposure* OR practicum* OR "off service" OR fieldwork OR "field-work" OR "field training" OR "field study" OR "field studies" OR "field education" OR "field experience" OR "workplace learn*" OR "workplace training" OR "practice learn*" OR "practice based learn*" OR "practical learn*" OR "experiential learn*" OR "experiential education" OR "work based learn*" OR "work integrated learn*" OR "service learning" OR "deliberate practice" OR rotation OR rotations OR "clinical practice" OR "clinical environment*" OR "clinical setting*" OR "clinical education" OR "co-op" OR "cooperative education" OR "collaborative learning" )                                                                                                                                                                                                                                                                                                                                               | 3,548,696 |
| 2                           | TITLE-ABS-KEY ( interprofession* OR "inter-profession*" OR interdisciplin* OR "inter-disciplin*" OR interinstitut* OR "inter-institut*" OR interagenc* OR "inter-agenc*" OR intersector* OR "inter-sector*" OR interdepartment* OR "inter-department*" OR interoccupation* OR "inter-occupation*" OR interorgani?ation* OR "inter-organi?ation*" OR multiprofession* OR "multi-profession*" OR multidisciplin* OR "multi-disciplin*" OR multiinstitut* OR "multi-institut*" OR multiagenc* OR "multi-agenc*" OR multisector* OR "multi-sector*" OR multidepartment* OR "multi-department*" OR multioccupation* OR "multi-occupation*" OR multiorgani?ation* OR "multi-organi?ation*" OR transprofession* OR "trans-profession*" OR transdisciplin* OR "trans-disciplin*" OR transagenc* OR "trans-agenc*" OR transsector* OR "trans-sector*" OR transdepartment* OR "trans-department*" OR transoccupation* OR "trans-occupation*" OR transorgani?ation* OR "transorgani?ation*" OR "cross-training" OR crossprofession* OR "cross-profession*" OR crossdisciplin* OR "cross- | 1,364,615 |

|    |                                                                                                                                                                                                                                                                                                                       |           |
|----|-----------------------------------------------------------------------------------------------------------------------------------------------------------------------------------------------------------------------------------------------------------------------------------------------------------------------|-----------|
|    | disciplin*" OR crossinstitut* OR "cross-institut*" OR crossagenc* OR "cross-agenc*" OR crosssector* OR "cross-sector*" OR crossdepartment* OR "cross-department*" OR crossoccupation* OR "cross-occupation*" OR crossorgani?ation* OR "cross-organi?ation*" OR team* OR collaborative OR ipp OR ipe OR ilp OR ipecp ) |           |
| 3  | SRCTITLE ( interprofession* )                                                                                                                                                                                                                                                                                         | 3,831     |
| 4  | 2 or 3                                                                                                                                                                                                                                                                                                                | 1,365,211 |
| 5  | TITLE-ABS-KEY ( ( ( primary OR ambulatory OR communit* OR general OR family ) W/2 ( care OR healthcare OR "health care" OR "health program*" OR "health centre*" OR "health center*" OR "health service*" OR practice* OR clinic* OR practition* OR medicine OR doctor* OR physician* OR clinician* ) ) )             | 845,825   |
| 6  | TITLE-ABS-KEY ( "private pract*" OR gp OR pcp OR cbhw )                                                                                                                                                                                                                                                               | 151,645   |
| 7  | SRCTITLE ( community OR "general practice*" OR "general practitioner*" OR "family practic*" OR "family medicine" OR "primary care" )                                                                                                                                                                                  | 199,783   |
| 8  | 5 or 6 or 7                                                                                                                                                                                                                                                                                                           | 1,104,683 |
| 9  | TITLE-ABS-KEY ( student* OR learner* OR resident OR residents OR intern OR interns OR pgy OR graduate* OR postgraduate* OR "post-grad*" OR undergraduate* OR "under-grad*" OR trainee* )                                                                                                                              | 2,166,925 |
| 10 | 1 and 4 and 8 and 9                                                                                                                                                                                                                                                                                                   | 3,146     |
| 11 | 10 (limited to 2001 to present)                                                                                                                                                                                                                                                                                       | 2,783     |
| 12 | 11 (limited to english)                                                                                                                                                                                                                                                                                               | 2,707     |

**Table 7. Social Services Abstracts**

| Database: Social Services Abstracts |                                                                                                                                                                                                                                                                                                                                                                                                                                                                                                                                                                                                                                                                                                                                                                                         |         |
|-------------------------------------|-----------------------------------------------------------------------------------------------------------------------------------------------------------------------------------------------------------------------------------------------------------------------------------------------------------------------------------------------------------------------------------------------------------------------------------------------------------------------------------------------------------------------------------------------------------------------------------------------------------------------------------------------------------------------------------------------------------------------------------------------------------------------------------------|---------|
| Platform: ProQuest                  |                                                                                                                                                                                                                                                                                                                                                                                                                                                                                                                                                                                                                                                                                                                                                                                         |         |
| Date Searched: Jul 11, 2023         |                                                                                                                                                                                                                                                                                                                                                                                                                                                                                                                                                                                                                                                                                                                                                                                         |         |
| #                                   | Searches                                                                                                                                                                                                                                                                                                                                                                                                                                                                                                                                                                                                                                                                                                                                                                                | Results |
| S1                                  | NOFT(clerkship* or preceptorship* or traineeship* or placement* or exposure* or practicum* or "off service" or fieldwork or "field-work" or "field training" or "field study" or "field studies" or "field education" or "field experience" or ("workplace learning") or "workplace training" or ("practice learning") or "practice based learn*" or ("practical learning") or ("experiential learning") or "experiential education" or "work based learn*" or "work integrated learn*" or "service learning" or "deliberate practice" or rotation or rotations or "clinical practice" or ("clinical environment" OR "clinical environments") or ("clinical setting" OR "clinical settings") or "clinical education" or "co-op" or "cooperative education" or "collaborative learning") | 29244   |
| S2                                  | MAINSUBJECT.EXACT("Field Instruction")                                                                                                                                                                                                                                                                                                                                                                                                                                                                                                                                                                                                                                                                                                                                                  | 256     |

|     |                                                                                                                                                                                                                                                                                                                                                                                                                                                                                                                                                                                                                                                                                                                                                                                                                                                                                                                                                                                                                                                                                                                                                                                                                                                                                                                                                                                        |       |
|-----|----------------------------------------------------------------------------------------------------------------------------------------------------------------------------------------------------------------------------------------------------------------------------------------------------------------------------------------------------------------------------------------------------------------------------------------------------------------------------------------------------------------------------------------------------------------------------------------------------------------------------------------------------------------------------------------------------------------------------------------------------------------------------------------------------------------------------------------------------------------------------------------------------------------------------------------------------------------------------------------------------------------------------------------------------------------------------------------------------------------------------------------------------------------------------------------------------------------------------------------------------------------------------------------------------------------------------------------------------------------------------------------|-------|
| S3  | MAINSUBJECT.EXACT("Service Learning") OR<br>MAINSUBJECT.EXACT("Internship Programs")                                                                                                                                                                                                                                                                                                                                                                                                                                                                                                                                                                                                                                                                                                                                                                                                                                                                                                                                                                                                                                                                                                                                                                                                                                                                                                   | 333   |
| S4  | 1 or 2 or 3                                                                                                                                                                                                                                                                                                                                                                                                                                                                                                                                                                                                                                                                                                                                                                                                                                                                                                                                                                                                                                                                                                                                                                                                                                                                                                                                                                            | 29344 |
| S5  | NOFT(interprofession* or "inter-profession*" or interdisciplin* or "inter-disciplin*" or interinstitut* or "inter-institut*" or interagenc* or "inter-agenc*" or intersector* or "inter-sector*" or interdepartment* or "inter-department*" or interoccupation* or "inter-occupation*" or interorgani?ation* or "inter-organi?ation*" or multiprofession* or "multi-profession*" or multidisciplin* or "multi-disciplin*" or multiinstitut* or "multi-institut*" or multiagenc* or "multi-agenc*" or multisector* or "multi-sector*" or multidepartment* or "multi-department*" or multioccupation* or "multi-occupation*" or multiorgani?ation* or "multi-organi?ation*" or transprofession* or "trans-profession*" or transdisciplin* or "trans-disciplin*" or transagenc* or "trans-agenc*" or transsector* or "trans-sector*" or transdepartment* or "trans-department*" or transoccupation* or "trans-occupation*" or transorgani?ation* or "transorgani?ation*" or "cross-training" or crossprofession* or "cross-profession*" or crossdisciplin* or "cross-disciplin*" or crossinstitut* or "cross-institut*" or crossagenc* or "cross-agenc*" or crosssector* or "cross-sector*" or crossdepartment* or "cross-department*" or crossoccupation* or "cross-occupation*" or crossorgani?ation* or "cross-organi?ation*" or team* or collaborative or IPP or IPE or ILP or IPECP) | 24597 |
| S6  | PUB(interprofession*)                                                                                                                                                                                                                                                                                                                                                                                                                                                                                                                                                                                                                                                                                                                                                                                                                                                                                                                                                                                                                                                                                                                                                                                                                                                                                                                                                                  | 295   |
| S7  | MAINSUBJECT.EXACT("Interprofessional Approach")                                                                                                                                                                                                                                                                                                                                                                                                                                                                                                                                                                                                                                                                                                                                                                                                                                                                                                                                                                                                                                                                                                                                                                                                                                                                                                                                        | 255   |
| S8  | MAINSUBJECT.EXACT("Interdisciplinary Approach")                                                                                                                                                                                                                                                                                                                                                                                                                                                                                                                                                                                                                                                                                                                                                                                                                                                                                                                                                                                                                                                                                                                                                                                                                                                                                                                                        | 914   |
| S9  | 5 or 6 or 7 or 8                                                                                                                                                                                                                                                                                                                                                                                                                                                                                                                                                                                                                                                                                                                                                                                                                                                                                                                                                                                                                                                                                                                                                                                                                                                                                                                                                                       | 24597 |
| S10 | NOFT((primary or ambulatory or communit* or general or family) N/2 (care or healthcare or "health care" or ("health program" OR "health programme" OR "health programmes" OR "health programs") or ("health centre" OR "health centres") or ("health center" OR "health centers") or ("health service" OR "health services") or practice* or clinic* or practition* or medicine or doctor* or physician* or clinician*))                                                                                                                                                                                                                                                                                                                                                                                                                                                                                                                                                                                                                                                                                                                                                                                                                                                                                                                                                               | 35867 |
| S11 | NOFT("private pract*" or GP or PCP or CBHW)                                                                                                                                                                                                                                                                                                                                                                                                                                                                                                                                                                                                                                                                                                                                                                                                                                                                                                                                                                                                                                                                                                                                                                                                                                                                                                                                            | 1262  |
| S12 | PUB(community or "general practice*" or "general practitioner*" or "family practic*" or "family medicine" or "primary care")                                                                                                                                                                                                                                                                                                                                                                                                                                                                                                                                                                                                                                                                                                                                                                                                                                                                                                                                                                                                                                                                                                                                                                                                                                                           | 17757 |
| S13 | MAINSUBJECT.EXACT("Primary Health Care")                                                                                                                                                                                                                                                                                                                                                                                                                                                                                                                                                                                                                                                                                                                                                                                                                                                                                                                                                                                                                                                                                                                                                                                                                                                                                                                                               | 1341  |
| S14 | MAINSUBJECT.EXACT("Private Practice")                                                                                                                                                                                                                                                                                                                                                                                                                                                                                                                                                                                                                                                                                                                                                                                                                                                                                                                                                                                                                                                                                                                                                                                                                                                                                                                                                  | 114   |
| S15 | 10 or 11 or 12 or 13 or 14                                                                                                                                                                                                                                                                                                                                                                                                                                                                                                                                                                                                                                                                                                                                                                                                                                                                                                                                                                                                                                                                                                                                                                                                                                                                                                                                                             | 47301 |
| S16 | NOFT(student* or learner* or resident or residents or intern or interns or PGY or graduate* or postgraduate* or "post-grad*" or undergraduate* or "under-grad*" or trainee*)                                                                                                                                                                                                                                                                                                                                                                                                                                                                                                                                                                                                                                                                                                                                                                                                                                                                                                                                                                                                                                                                                                                                                                                                           | 52565 |
| S17 | MAINSUBJECT.EXACT("Medical Students")                                                                                                                                                                                                                                                                                                                                                                                                                                                                                                                                                                                                                                                                                                                                                                                                                                                                                                                                                                                                                                                                                                                                                                                                                                                                                                                                                  | 275   |
| S18 | 16 or 17                                                                                                                                                                                                                                                                                                                                                                                                                                                                                                                                                                                                                                                                                                                                                                                                                                                                                                                                                                                                                                                                                                                                                                                                                                                                                                                                                                               | 52565 |

|     |                                |     |
|-----|--------------------------------|-----|
| S19 | 4 and 9 and 15 and 18          | 121 |
| S20 | 19 [limited to 2001 - present] | 101 |
| S21 | 21 [limited to english]        | 101 |
