# Supplementary material for: Exploring experiential learning within interprofessional practice education initiatives for pre-licensure healthcare students: a scoping review
Source: PubMed Central journal article supplement (PMC10863283; doi:10.1186/s12909-024-05114-w), 2024-02-13
Supplement: 12909_2024_5114_MOESM3_ESM.pdf [file 12909_2024_5114_MOESM3_ESM.pdf]

## Supplementary File #3

## Articles Included for Extraction from Literature Search of Interprofessional Practice (IPP) Education Initiatives

| Author                                                                                                                                                                                                                                                                                                                                                                                                                                                                                                         | Country       | Literature Typology<br>(methodological approach, if applicable) | Purpose or Aim of Article                                                                                                                                                                                                       | Setting(s)<br>IPP Education Approach/<br>Strategies                                                                                                                                                                                                                                                                                                            | Student Disciplines Involved                                    |
|----------------------------------------------------------------------------------------------------------------------------------------------------------------------------------------------------------------------------------------------------------------------------------------------------------------------------------------------------------------------------------------------------------------------------------------------------------------------------------------------------------------|---------------|-----------------------------------------------------------------|---------------------------------------------------------------------------------------------------------------------------------------------------------------------------------------------------------------------------------|----------------------------------------------------------------------------------------------------------------------------------------------------------------------------------------------------------------------------------------------------------------------------------------------------------------------------------------------------------------|-----------------------------------------------------------------|
| Adams, A.L., Cadle, R. M., Amspoker, A. B., Martin, L. A., Wilmer, S. R., Fernandez, J. M., Pereira, C. E., Shah, R. M., Woodard, L. D., & Hatfield, C. L. (2019). Preliminary evaluation of pharmacy resident integration within an academic interprofessional patient aligned care team at a Veterans Affairs Academic Medical Center. <i>Journal of Interprofessional Education and Practice</i> , 15(), 55-59.<br>DOI: <a href="https://doi.org/10.1016/j.xjep.2019.02.003">10.1016/j.xjep.2019.02.003</a> | United States | Primary research<br>(Mixed methods)                             | The purpose of this paper was to describe pharmacy residents' experience and other post-graduate trainees' perspectives of pharmacy involvement in the initial stages of an interprofessional ambulatory care training program. | <i>CarePlus Clinic and Ambulatory Care</i><br>- didactic sessions on interprofessional and clinical topics led by faculty<br>- reflections at the end of sessions<br>- collaborative work on evaluation of medication use, quality improvement projects, and other evaluation activities<br>- 1-hour case presentations by trainees to all members and faculty | Medicine<br>Nurse practitioners<br>Pharmacy<br>Psychology       |
| Aggar, C., Mozolic-Staunton, B., Lovi, R. J., Scorey, M., Kemp, M., Walker, T., & Lewis, S. (2020). An interprofessional clinical placement in a primary healthcare setting: A pilot study. <i>Internet Journal of Allied</i>                                                                                                                                                                                                                                                                                  | Australia     | Primary research<br>(quantitative – longitudinal pilot study)   | The aim of this study was to evaluate the impact of IPE clinical placement in a primary healthcare setting on students' perceptions of interprofessional education.                                                             | <i>Primary care</i><br>- clinical placements<br>- daily meetings and debriefs                                                                                                                                                                                                                                                                                  | Nursing<br>Occupational therapy<br>Podiatry<br>Speech pathology |

| Author                                                                                                                                                                                                                                                                                                                                                     | Country        | Literature Typology<br>(methodological approach, if applicable) | Purpose or Aim of Article                                                                                                                                                                                                                                                                                                                              | Setting(s)<br>IPP Education Approach/<br>Strategies                                                                                                                     | Student Disciplines Involved                                                |
|------------------------------------------------------------------------------------------------------------------------------------------------------------------------------------------------------------------------------------------------------------------------------------------------------------------------------------------------------------|----------------|-----------------------------------------------------------------|--------------------------------------------------------------------------------------------------------------------------------------------------------------------------------------------------------------------------------------------------------------------------------------------------------------------------------------------------------|-------------------------------------------------------------------------------------------------------------------------------------------------------------------------|-----------------------------------------------------------------------------|
| <i>Health Sciences and Practice</i> , 18(1), 6.<br>DOI: <a href="https://doi.org/10.46743/1540-580X/2020.1844">10.46743/1540-580X/2020.1844</a> .                                                                                                                                                                                                          |                |                                                                 |                                                                                                                                                                                                                                                                                                                                                        | - development of health promotion initiative                                                                                                                            |                                                                             |
| Anderson, E. S., Ford, J., & Kinnair, D. J. (2016). Interprofessional education and practice guide no. 6: developing practice-based interprofessional learning using a short placement model. <i>Journal of Interprofessional Care</i> , 30(4), 433-440.<br>DOI: <a href="https://doi.org/10.3109/13561820.2016.1160040">10.3109/13561820.2016.1160040</a> | United Kingdom | Practice guide                                                  | This guide offers key lessons developed over many years for setting up practice-based IPE. The learning model has been adapted and adopted in different settings and countries and offers a method for engaging clinical frontline practitioners in learning with, and from learners who can help support and in some instances advance care delivery. | Not applicable                                                                                                                                                          | None specified (multiple disciplines described in curriculum mapping)       |
| Anderson, E. S., & Lennox, A. (2009). The Leicester model of interprofessional education: developing, delivering and learning from student voices for 10 years. <i>Journal of Interprofessional Care</i> , 23(6), 557-573.<br>DOI: <a href="https://doi.org/10.3109/13561820903051451">10.3109/13561820903051451</a>                                       | United Kingdom | Program description<br>(Mixed methods)                          | An aim/purpose of article was not explicitly stated. Authors described the original setting and presents the evaluation outcomes of the Leicester Model's "Health in the Community" course that is delivered in city-centre communities. It traces a ten-year trajectory of IP student group evaluations that helped shape this learning experience.   | <i>Health and social care centre</i><br>- small groups of mixed disciplines<br>- joint interview of clients in home visit<br>- interviews with healthcare practitioners | Medicine<br>Nursing<br>Pharmacy<br>Social work<br>Speech & language therapy |
| Anderson, E. S., Smith, R., & Thorpe, L. N. (2010). Learning from lives together: medical and social work                                                                                                                                                                                                                                                  | United Kingdom | Primary research<br>(Mixed methods)                             | The study aimed to evaluate an interprofessional community-                                                                                                                                                                                                                                                                                            | <i>Community hospitals</i>                                                                                                                                              | Medicine<br>Social work                                                     |

| Author                                                                                                                                                                                                                                                                                                                                                                                                                                          | Country        | Literature Typology<br>(methodological approach, if applicable)                     | Purpose or Aim of Article                                                                                                                                                                                                                                                       | Setting(s)<br>IPP Education Approach/<br>Strategies                                                                                                                      | Student Disciplines Involved                                                    |
|-------------------------------------------------------------------------------------------------------------------------------------------------------------------------------------------------------------------------------------------------------------------------------------------------------------------------------------------------------------------------------------------------------------------------------------------------|----------------|-------------------------------------------------------------------------------------|---------------------------------------------------------------------------------------------------------------------------------------------------------------------------------------------------------------------------------------------------------------------------------|--------------------------------------------------------------------------------------------------------------------------------------------------------------------------|---------------------------------------------------------------------------------|
| students' experiences of learning from people with disabilities in the community. <i>Health and Social Care in the Community</i> , 18(3), 229-240.<br>DOI: <a href="https://doi.org/10.1111/j.1365-2524.2010.00921.x">10.1111/j.1365-2524.2010.00921.x</a>                                                                                                                                                                                      |                |                                                                                     | based learning event, focussing on disability.                                                                                                                                                                                                                                  | - small IP groups of 3-4 students to work with clients with disabilities<br>- reflective evaluation                                                                      |                                                                                 |
| Anderson, E. S., & Thorpe, L. N. (2014). Students improve patient care and prepare for professional practice: an interprofessional community-based study. <i>Medical Teacher</i> , 36(6), 495-504.<br>DOI: <a href="https://doi.org/10.3109/0142159X.2014.890703">10.3109/0142159X.2014.890703</a>                                                                                                                                              | United Kingdom | Primary research<br>(Qualitative – exploratory qualitative study, realist approach) | An aim/purpose of article was not explicitly stated. Authors prospectively followed interprofessional student teams in mid-training using an IPL model to assess how learning contributions to patient and service outcomes where the model is used in inner city primary care. | <i>Inner city primary care teams</i><br>- small IP groups of 3-5 students work with professionals<br>- written feedback                                                  | Medicine<br>Nursing<br>Social work<br>Pharmacy<br>Speech and language therapy   |
| Block, L., LaVine, N. A., Martinez, J., Strawser, J., Lu, C., Cacace, F., Fornari, A., Conigliaro, J., & Coletti, D. J. (2021). A novel longitudinal interprofessional ambulatory training practice: the improving patient access care and cost through training (IMPACcT) clinic. <i>Journal of Interprofessional Care</i> , 35(3), 472-475.<br>DOI: <a href="https://doi.org/10.1080/13561820.2020.1751595">10.1080/13561820.2020.1751595</a> | United States  | Program evaluation<br>(Quantitative)                                                | Evaluation of learner outcomes, provider continuity, quality of clinical outcomes, and patient satisfaction of the IMPACcT training clinic.                                                                                                                                     | <i>Primary care facilities</i><br>- brief huddles to collaborate, plan workflows, discuss topics and negotiate approaches to patient care<br>- interprofessional signout | Medicine<br>Physician<br>Physician assistant<br>Pharmacy<br>Psychology trainees |

| Author                                                                                                                                                                                                                                                                                                                         | Country       | Literature Typology (methodological approach, if applicable) | Purpose or Aim of Article                                                                                                                                                                                               | Setting(s) IPP Education Approach/ Strategies                                                                                                                                            | Student Disciplines Involved                                                                                 |
|--------------------------------------------------------------------------------------------------------------------------------------------------------------------------------------------------------------------------------------------------------------------------------------------------------------------------------|---------------|--------------------------------------------------------------|-------------------------------------------------------------------------------------------------------------------------------------------------------------------------------------------------------------------------|------------------------------------------------------------------------------------------------------------------------------------------------------------------------------------------|--------------------------------------------------------------------------------------------------------------|
| Bluestein, D., & Cubic, B. A. (2009). Psychologists and primary care physicians: a training model for creating collaborative relationships. <i>Journal of Clinical Psychology in Medical Settings</i> , 16(1), 101-112. DOI: <a href="https://doi.org/10.1007/s10880-009-9156-9">10.1007/s10880-009-9156-9</a>                 | United States | Program description                                          | This article described the importance of primary care and psychology partnering to create integrated care models and makes the case that such partnerships are not only beneficial to patients but to both professions. | <i>Primary care</i><br>- training in interdisciplinary team skills<br>- additional didactics on psychosocial issues and multicultural diversity<br>- collaboratively designed treatments | Medical residents<br>Psychology interns                                                                      |
| Bondevik, G. T., Holst, L., Haugland, M. J., Baerheim, A., & Raaheim, A. (2015). Interprofessional workplace learning in primary care: students from different health professions work in teams in real-life settings. <i>International Journal of Teaching and Learning in Higher Education</i> , 27(2), 175-182. DOI: no doi | Norway        | Primary research (Qualitative)                               | The aim of this study is to describe and discuss the self-reported experience from Norwegian health care students participating in interprofessional workplace learning in primary care.                                | <i>Nursing homes and public health clinics</i><br>- interview and assess patients<br>- collaboration in writing an individualized treatment plan<br>- work in groups of 4-5              | Dental hygiene<br>Medicine<br>Midwifery<br>Nursing (public health)<br>Nutrition<br>Pharmacy<br>Physiotherapy |
| Brewer, M. L., Flavell, H. L., & Jordan, J. (2017). Interprofessional team-based placements: the importance of space, place, and facilitation. <i>Journal of Interprofessional Care</i> , 31(4), 429-437.                                                                                                                      | Australia     | Primary research (Case study – exploratory)                  | This study aimed to understand students' perceptions of the impact of an interprofessional placement on their learning.                                                                                                 | <i>Primary schools and aged care facility</i><br>- collaborated at different points to provide interventions                                                                             | Counselling<br>Dietetics<br>Nursing<br>Occupational therapists                                               |

| Author                                                                                                                                                                                                                                                                                                               | Country       | Literature Typology<br>(methodological approach, if applicable) | Purpose or Aim of Article                                                                                                                                                                                                                                 | Setting(s)<br>IPP Education Approach/<br>Strategies                                                                                                                                                                                                                                                                                                                                                        | Student Disciplines Involved                                                                                                                                                                                 |
|----------------------------------------------------------------------------------------------------------------------------------------------------------------------------------------------------------------------------------------------------------------------------------------------------------------------|---------------|-----------------------------------------------------------------|-----------------------------------------------------------------------------------------------------------------------------------------------------------------------------------------------------------------------------------------------------------|------------------------------------------------------------------------------------------------------------------------------------------------------------------------------------------------------------------------------------------------------------------------------------------------------------------------------------------------------------------------------------------------------------|--------------------------------------------------------------------------------------------------------------------------------------------------------------------------------------------------------------|
| DOI: <a href="https://doi.org/10.1080/13561820.2017.1308318">10.1080/13561820.2017.1308318</a>                                                                                                                                                                                                                       |               |                                                                 |                                                                                                                                                                                                                                                           | tailored to professions.                                                                                                                                                                                                                                                                                                                                                                                   | Pharmacy<br>Physiotherapy<br>Psychology<br>Speech pathology                                                                                                                                                  |
| Bridges, D. R., Davidson, R. A., Odegard, P. S., Maki, I. V., & Tomkowiak, J. (2011). Interprofessional collaboration: three best practice models of interprofessional education. <i>Medical Education Online</i> , 16(1), 6035.<br>DOI: <a href="https://doi.org/10.3402/meo.v16i0.6035">10.3402/meo.v16i0.6035</a> | United States | Program description                                             | An aim/purpose of article was not explicitly stated. Authors showcased three exemplary models of collaborative and interprofessional educational experiences so that other institutions may benefit from these when creating interprofessional curricula. | <i>Placement at clinical site; Home visits to families; Rural and underserved populations</i><br>Varied according to institution, but included:<br>- observation of clients and discussion of cases<br>- joint meetings with course coordinators<br>- post-interview reflection with mentor<br>- IP teams of 3 students for visits<br>- “windshield survey” of client’s neighborhood<br>- service projects | Clinical laboratory<br>Dentistry<br>Medicine<br>Nurse anesthetists<br>Nursing<br>Nutrition<br>Pharmacy<br>Physical therapy<br>Physician assistants<br>Podiatry<br>Psychology<br>Public health<br>Social work |

| Author                                                                                                                                                                                                                                                                                                                                                                             | Country       | Literature Typology<br>(methodological approach, if applicable) | Purpose or Aim of Article                                                                                                                                | Setting(s)<br>IPP Education Approach/<br>Strategies                                                                                                                                                                                                   | Student Disciplines Involved                                                                                                                             |
|------------------------------------------------------------------------------------------------------------------------------------------------------------------------------------------------------------------------------------------------------------------------------------------------------------------------------------------------------------------------------------|---------------|-----------------------------------------------------------------|----------------------------------------------------------------------------------------------------------------------------------------------------------|-------------------------------------------------------------------------------------------------------------------------------------------------------------------------------------------------------------------------------------------------------|----------------------------------------------------------------------------------------------------------------------------------------------------------|
| <p>Buff, S. M., Jenkins, K., Kern, D., Worrall, C., Howell, D., Martin, K., Brown, D., White, A., &amp; Blue, A. (2015). Interprofessional service-learning in a community setting: findings from a pilot study. <i>Journal of Interprofessional Care</i>, 29(2), 159-161.</p> <p>DOI: <a href="https://doi.org/10.3109/13561820.2014.934956">10.3109/13561820.2014.934956</a></p> | United States | Primary research<br>(Mixed methods)                             | The aim of this study was to share the results from an interprofessional service-learning project (ISLP) targeting students across eight disciplines.    | <i>Community site</i><br>- outreach activities<br>- appreciating interprofessional collaboration                                                                                                                                                      | Biomedical science<br>Dietetic interns<br>Masters in health administration<br>Medicine<br>Nursing<br>Pharmacy<br>Physical therapy<br>Physician assistant |
| <p>Busen, N. H. (2014). An interprofessional education project to address the health care needs of women transitioning from prison to community reentry. <i>Journal of Professional Nursing</i>, 30(4), 357-366.</p> <p>DOI: <a href="https://doi.org/10.1016/j.profnurs.2014.01.002">10.1016/j.profnurs.2014.01.002</a></p>                                                       | United States | Program description                                             | The purpose of this article was to describe the development of an IPE course that illustrates the advantages and challenges associated with the process. | <i>University health science center and community NGO site</i><br>- interactive teaching-learning sessions<br>- worked in teams<br>- develop a curriculum<br>- collaborated with community partners<br>- step back exercise and reflective journaling | Dentistry<br>Nursing<br>Nutrition                                                                                                                        |

| Author                                                                                                                                                                                                                                                                                                                                                                             | Country       | Literature Typology<br>(methodological approach, if applicable) | Purpose or Aim of Article                                                                                                                                                                                                                                                           | Setting(s)<br>IPP Education Approach/<br>Strategies                                                                                                  | Student Disciplines Involved                                     |
|------------------------------------------------------------------------------------------------------------------------------------------------------------------------------------------------------------------------------------------------------------------------------------------------------------------------------------------------------------------------------------|---------------|-----------------------------------------------------------------|-------------------------------------------------------------------------------------------------------------------------------------------------------------------------------------------------------------------------------------------------------------------------------------|------------------------------------------------------------------------------------------------------------------------------------------------------|------------------------------------------------------------------|
| Cappiello, J. D., Joy, J., Smith, P., & Orgren, R. A. (2015). The SEARCH project: Acquainting students in the health professions with interprofessional care. <i>Journal of Allied Health, 44</i> (2), 91-95.<br>DOI: no doi                                                                                                                                                       | United States | Primary research<br>(Qualitative)                               | The purpose of this paper was to provide affirmative evidence for an interprofessional education and practice project that relies upon shared responsibility for quality outcomes.                                                                                                  | <i>Post-secondary educational institutions</i><br>- shadowed HCPs<br>- presentations, team building exercises<br>- team conferences<br>- debriefings | Medicine<br>Nursing<br>Physician assistant                       |
| Chen, P., Clark, M., Sharma, M., Troya, Y., Cenzer, I., & Rivera, J. (2021). A longitudinal workplace-based interprofessional curriculum for graduate learners in a geriatrics patient-centered medical home. <i>Journal of Interprofessional Education and Practice, 24</i> , 100459.<br>DOI: <a href="https://doi.org/10.1016/j.xjep.2021.100459">10.1016/j.xjep.2021.100459</a> | United States | Program evaluation                                              | An aim/purpose of article was not explicitly stated. Authors described a year-long workplace-based IP curriculum that incorporated workplace learning principles to improve IP collaborative competencies, improve perceived teamness, and provide team-based care to older adults. | <i>Academic patient-centered medical home</i><br>- active individual and collective provision of care<br>- engagement in operations of the practice  | Law (medical-legal focus)<br>Medicine<br>Pharmacy<br>Social work |
| Chirico, M., Thompson, J. R., & Steil, C. (2014). Development and implementation of a collaborative interprofessional learning program. <i>Currents in Pharmacy Teaching and Learning, 6</i> (4), 550-557.<br>DOI: <a href="https://doi.org/10.1016/j.cptl.2014.04.006">10.1016/j.cptl.2014.04.006</a>                                                                             | United States | Program description<br>(Quantitative)                           | This article described the implementation and first two years of follow-up of a novel interprofessional program.                                                                                                                                                                    | <i>Post-secondary educational institutions</i><br>- weekly reflection<br>- worked in teams of 4<br>- co-curricular materials                         | Medicine<br>Nurse practitioners<br>Pharmacy<br>Social work       |

| Author                                                                                                                                                                                                                                                                                                                                                                           | Country       | Literature Typology (methodological approach, if applicable) | Purpose or Aim of Article                                                                                                                                                                                                                                                                | Setting(s) IPP Education Approach/ Strategies                                                                                                                                                                                           | Student Disciplines Involved                                                                                                                                                                                   |
|----------------------------------------------------------------------------------------------------------------------------------------------------------------------------------------------------------------------------------------------------------------------------------------------------------------------------------------------------------------------------------|---------------|--------------------------------------------------------------|------------------------------------------------------------------------------------------------------------------------------------------------------------------------------------------------------------------------------------------------------------------------------------------|-----------------------------------------------------------------------------------------------------------------------------------------------------------------------------------------------------------------------------------------|----------------------------------------------------------------------------------------------------------------------------------------------------------------------------------------------------------------|
|                                                                                                                                                                                                                                                                                                                                                                                  |               |                                                              |                                                                                                                                                                                                                                                                                          | <ul style="list-style-type: none"> <li>- self-directed learning</li> <li>- active learning strategy “debrief”</li> </ul>                                                                                                                |                                                                                                                                                                                                                |
| <p>Chrisman-Khawam, L., Abdullah, N., &amp; Dhoopar, A. (2017). Teaching health-care trainees empathy and homelessness IQ through service learning, reflective practice, and altruistic attribution. <i>The International Journal of Psychiatry in Medicine</i>, 52(3), 245-254.</p> <p>DOI: <a href="https://doi.org/10.1177/0091217417730288">10.1177/0091217417730288</a></p> | United States | Program description                                          | This article described a novel interprofessional curriculum designed to address the needs of homeless patients in a Midwestern of the United States which has high rates of poverty.                                                                                                     | <p><i>Homeless shelters and health care centers</i></p> <ul style="list-style-type: none"> <li>- working in IP groups</li> <li>- post-session debrief</li> </ul>                                                                        | <ul style="list-style-type: none"> <li>Clinical psychology</li> <li>Medicine</li> <li>Nursing</li> <li>Pharmacy</li> <li>Psychiatry</li> <li>Social work</li> <li>Undergraduate pre-medical program</li> </ul> |
| <p>Claeys, T., Dolmans, D., &amp; de Nooijer, J. (2022). Design and evaluation of a team-based interprofessional practice placement: A design-based research approach. <i>Medical Teacher</i>, 44(8), 866-871.</p> <p>DOI: <a href="https://doi.org/10.1080/0142159X.2022.2041188">10.1080/0142159X.2022.2041188</a></p>                                                         | Netherlands   | Primary research (Qualitative – design-based research)       | The study explored the design and evaluation of Team-based Interprofessional Practice Placements to support undergraduate students in gaining a better understanding of the complexity of patient problems in primary care settings and of collaboration within interprofessional teams. | <p><i>Project organized in the community</i></p> <ul style="list-style-type: none"> <li>- work in small IP teams with clients and caregivers</li> <li>- support/coaching from teachers using a scaffold approach to learning</li> </ul> | <ul style="list-style-type: none"> <li>Dietetics</li> <li>Nursing</li> <li>Occupational therapy</li> <li>Social work</li> <li>Speech therapy</li> </ul>                                                        |
| <p>Claiborne, D. M., Poston, R., &amp; Joufi, A. (2020). Innovative collaborative service-learning experience among</p>                                                                                                                                                                                                                                                          | United States | Primary research (Quantitative)                              | The purpose of this study was to pilot an innovative, collaborative service-learning (ICSL)                                                                                                                                                                                              | <i>Child development center</i>                                                                                                                                                                                                         | <ul style="list-style-type: none"> <li>Dental hygiene</li> <li>Nurse practitioner</li> </ul>                                                                                                                   |



| Author                                                                                                                                                                                                                                                                                                                                                     | Country       | Literature Typology (methodological approach, if applicable) | Purpose or Aim of Article                                                                                                                                                                                                                                                                                                 | Setting(s) IPP Education Approach/ Strategies                                                                                                                                                    | Student Disciplines Involved                                       |
|------------------------------------------------------------------------------------------------------------------------------------------------------------------------------------------------------------------------------------------------------------------------------------------------------------------------------------------------------------|---------------|--------------------------------------------------------------|---------------------------------------------------------------------------------------------------------------------------------------------------------------------------------------------------------------------------------------------------------------------------------------------------------------------------|--------------------------------------------------------------------------------------------------------------------------------------------------------------------------------------------------|--------------------------------------------------------------------|
| <p>dental hygiene and nurse practitioner students: A pediatric oral health pilot study. <i>The Journal of Dental Hygiene</i>, 94(3), 29-36.</p> <p>DOI: no doi</p>                                                                                                                                                                                         |               |                                                              | <p>experience for dental hygiene and primary care nurse practitioner students to address pediatric oral health.</p>                                                                                                                                                                                                       | <p>- collaboration on development of education materials<br/>- hands-on learning and activities</p>                                                                                              |                                                                    |
| <p>Copley, J. A., Allison, H. D., Hill, A. E., Moran, M. C., Tait, J. A., &amp; Day, T. (2007). Making interprofessional education real: a university clinic model. <i>Australian Health Review</i>, 31(3), 351-357.</p> <p>DOI: <a href="https://doi.org/10.1071/ah070351">10.1071/ah070351</a></p>                                                       | Australia     | Program description                                          | <p>The purpose of this paper is to report on the development of university-conducted clinical services that provide students with the opportunity for authentic IP clinical education.</p>                                                                                                                                | <p><i>University-conducted clinics</i><br/>- collaborative client goal setting<br/>- weekly therapy session planning</p>                                                                         | <p>Music therapy<br/>Occupational therapy<br/>Speech pathology</p> |
| <p>Cox, L., Fugit, A. M., Ryan, M., Gregory, A., &amp; Mayer, S. (2014). Una Vida Sana!: An interprofessional service-learning outreach project in an underserved Latino population. <i>Currents in Pharmacy Teaching and Learning</i>, 6(4), 577-584.</p> <p>DOI: <a href="https://doi.org/10.1016/j.cptl.2014.03.002">10.1016/j.cptl.2014.03.002</a></p> | United States | Program description                                          | <p>An aim/purpose of article was not explicitly stated. Authors described three objectives related to how an IP service-learning project was developed, a description of community participants involved in the project's activities, and report on student perceptions of preparing for and engaging in the project.</p> | <p><i>Large free clinic (CrossOver Healthcare Ministry)</i><br/>- active participation in project leadership (e.g. recruitment of volunteers)<br/>- coordination of IP training for students</p> | <p>Medicine<br/>Nursing<br/>Pharmacy</p>                           |
| <p>Crocker, A., Fisher, K., &amp; Smith, T. (2015). When students from different professions are co-located: the importance of interprofessional rapport for learning to work together.</p>                                                                                                                                                                | Australia     | Primary research (Qualitative – exploratory study)           | <p>The study aimed to explore the issue of co-location and its effects on how students learn to work with other professions.</p>                                                                                                                                                                                          | <p><i>Community health services</i><br/>- shared accommodations</p>                                                                                                                              | <p>Nursing<br/>Nutrition and dietetics<br/>Medicine</p>            |

| Author                                                                                                                                                                                                                                                                                                                                                          | Country       | Literature Typology<br>(methodological approach, if applicable) | Purpose or Aim of Article                                                                                                                                                                                                                           | Setting(s)<br>IPP Education Approach/<br>Strategies                                                                    | Student Disciplines Involved    |
|-----------------------------------------------------------------------------------------------------------------------------------------------------------------------------------------------------------------------------------------------------------------------------------------------------------------------------------------------------------------|---------------|-----------------------------------------------------------------|-----------------------------------------------------------------------------------------------------------------------------------------------------------------------------------------------------------------------------------------------------|------------------------------------------------------------------------------------------------------------------------|---------------------------------|
| <i>Journal of Interprofessional Care</i> , 29(1), 41-48.<br>DOI: <a href="https://doi.org/10.3109/13561820.2014.937481">10.3109/13561820.2014.937481</a>                                                                                                                                                                                                        |               | using hermeneutics)                                             |                                                                                                                                                                                                                                                     | - IPL sessions                                                                                                         | Pharmacy<br>Speech pathology    |
| Danhausen, K., Joshi, D., Quirk, S., Miller, R., Fowler, M., & Schorn, M. N. (2015). Facilitating access to prenatal care through an interprofessional student-run free clinic. <i>Journal of Midwifery &amp; Women's Health</i> , 60(3), 267-273.<br>DOI: <a href="https://doi.org/10.1111/jmwh.12304">10.1111/jmwh.12304</a>                                  | United States | Primary research<br>(Quantitative – retrospective chart review) | The purpose of this article was to present the model of a prenatal clinic offered by a student-run health center.                                                                                                                                   | <i>Primary care</i><br>- team of 2<br>- provision of patient care (learning with and from each other)                  | Medicine<br>Midwifery           |
| Davis, L. I., Wright, D. J., Gutierrez, M. S., Nam, J. J., Nguyen, J., & Waite, A. T. (2015). Interprofessional global service learning: a pharmacy and nursing practice experience in Botswana. <i>Currents in Pharmacy Teaching and Learning</i> , 7(2), 169-178.<br>DOI: <a href="https://doi.org/10.1016/j.cptl.2014.11.017">10.1016/j.cptl.2014.11.017</a> | United States | Program description<br>(Mixed methods)                          | This paper aimed to describe the development, implementation and assessment of an interprofessional global service-learning experience in rural government-run clinics and community hospital for pharmacy and nursing students in Kanye, Botswana. | <i>Primary care</i><br>- engagement in clinical practice                                                               | Nursing<br>Pharmacy             |
| Dolce, M. C., Parker, J. L., Marshall, C., Riedy, C. A., Simon, L. E., Barrow, J., Ramos, C. R., & DaSilva, J. D. (2017). Expanding collaborative boundaries in nursing education and practice: the nurse practitioner-dentist                                                                                                                                  | United States | Program description                                             | The purpose of this paper was to describe the design and implementation of a novel interprofessional collaborative practice education program, the Nurse Practitioner-Dentist Model for Primary Care (NPD Program). The NPD Program                 | <i>University dental facility</i><br>- self-directed online modules<br>- IPC practice leadership and teamwork training | Dentistry<br>Nurse practitioner |

| Author                                                                                                                                                                                                                                                                                                                                                                                                        | Country       | Literature Typology<br>(methodological approach, if applicable)           | Purpose or Aim of Article                                                                                                                                                           | Setting(s)<br>IPP Education Approach/<br>Strategies                                        | Student Disciplines Involved                                                         |
|---------------------------------------------------------------------------------------------------------------------------------------------------------------------------------------------------------------------------------------------------------------------------------------------------------------------------------------------------------------------------------------------------------------|---------------|---------------------------------------------------------------------------|-------------------------------------------------------------------------------------------------------------------------------------------------------------------------------------|--------------------------------------------------------------------------------------------|--------------------------------------------------------------------------------------|
| <p>model for primary care. <i>Journal of Professional Nursing</i>, 33(6), 405-409.<br/>DOI: <a href="https://doi.org/10.1016/j.profnurs.2017.04.002">10.1016/j.profnurs.2017.04.002</a></p>                                                                                                                                                                                                                   |               |                                                                           | <p>expands collaborative boundaries in nursing and dental education by integrating primary care services, provided by a nurse practitioner, within an academic dental practice.</p> | <p>- supervised clinical rotations<br/>- constructive feedback for team and individual</p> |                                                                                      |
| <p>Doucet, J. R., Fournier, T. A., Bishop, C. M., Gaudet, D. J., &amp; Nagel, D. A. (2021). Pilot of a community-based interprofessional “student-infused” pulmonary rehabilitation program in Saint John, New Brunswick. <i>Canadian Journal of Respiratory Therapy</i>, 57, 26-31.<br/>DOI: <a href="https://doi.org/10.29390/cjrt-2020-053">10.29390/cjrt-2020-053</a></p>                                 | Canada        | Primary research<br>(Quantitative – pre and post test quasi-experimental) | The overall goal of this project was to pilot implementation of a community-based interprofessional “student-infused” PR program and examine the efficacy of such an initiative.    | <p><i>Post-secondary educational institution</i><br/>- working in IP team</p>              | <p>Nursing<br/>Practical nursing<br/>Pharmacy technician<br/>Respiratory therapy</p> |
| <p>Elliott, K. J., Annear, M. J., Bell, E. J., Palmer, A. J., &amp; Robinson, A. L. (2015). Residents with mild cognitive decline and family members report health students ‘enhance capacity of care’ and bring ‘a new breath of life’ in two aged care facilities in Tasmania. <i>Health Expectations</i>, 18(6), 1927-1940.<br/>DOI: <a href="https://doi.org/10.1111/hex.12236">10.1111/hex.12236</a></p> | Australia     | Primary research<br>(Mixed methods)                                       | The purpose of the article was to describe the perspective of a select group of residents with mild cognitive decline and their family members on student doctors and nurses.       | <p><i>Aged-care facilities</i><br/>- collaborative assessment and recommendations</p>      | <p>Medicine<br/>Nursing</p>                                                          |
| <p>Flinn, S., Kloos, A., Teaford, M., Clark, K., &amp; Szucs, K. (2009). Helping hands for healthy living: a</p>                                                                                                                                                                                                                                                                                              | United States | Program evaluation                                                        | The purpose of this article was to describe the development of a unique interdisciplinary service-                                                                                  | <i>Primary care</i>                                                                        | Physical therapy                                                                     |

| Author                                                                                                                                                                                                                                                                                                                                                                  | Country   | Literature Typology<br>(methodological approach, if applicable) | Purpose or Aim of Article                                                                                                                                              | Setting(s)<br>IPP Education Approach/<br>Strategies                                                                                                                                               | Student Disciplines Involved                                                                                                     |
|-------------------------------------------------------------------------------------------------------------------------------------------------------------------------------------------------------------------------------------------------------------------------------------------------------------------------------------------------------------------------|-----------|-----------------------------------------------------------------|------------------------------------------------------------------------------------------------------------------------------------------------------------------------|---------------------------------------------------------------------------------------------------------------------------------------------------------------------------------------------------|----------------------------------------------------------------------------------------------------------------------------------|
| collaborative service learning project with occupational and physical therapy students. <i>Occupational Therapy in Health Care</i> , 23(2), 146-167.<br>DOI: <a href="https://doi.org/10.1080/07380570902779807">10.1080/07380570902779807</a>                                                                                                                          |           | (Mixed methods)                                                 | learning course and to evaluate the impact of this experience on allied health students' professional development.                                                     | - one 4-hour classroom experience<br>- four 2-hour service activities                                                                                                                             | Occupational therapy                                                                                                             |
| Forbes, R., Beckman, E., Tower, M., Mandrusiak, A., Mitchell, L. K., Sexton, C. T., Cunningham, B., & Lewis, P. A. (2021). Interprofessional, student-led community health clinic: expanding service provision and clinical education capacity. <i>Australian Health Review</i> , 45(2), 255-260.<br>DOI: <a href="https://doi.org/10.1071/AH20021">10.1071/AH20021</a> | Australia | Primary research<br>(Case study)                                | The purpose of this article was to describe the operation of a new interprofessional student-led community health model over its initial 13-month period of operation. | <i>Post-secondary educational institution</i><br>- daily team meetings<br>- case conferences and informal student discussions<br>- collaborative consultations/assessments<br>- frequent debriefs | Counselling<br>Dietetics<br>Exercise physiology<br>Nursing<br>Occupational therapy<br>Physiotherapy<br>Psychology<br>Social work |
| Frakes, K., Brownie, S., Davies, L., Thomas, J., Miller, M., & Tyack, Z. (2014). Experiences from an interprofessional student-assisted chronic disease clinic. <i>Journal of Interprofessional Care</i> , 28(6), 573-575.<br>DOI: <a href="https://doi.org/10.3109/13561820.2014.917404">10.3109/13561820.2014.917404</a>                                              | Australia | Primary research<br>(Mixed methods)                             | The purpose of this article was to provide early evaluative information concerning student experiences included in self-reported changes in practice.                  | <i>Allied health partnership</i><br>- IP team with professional specific group work<br>- case conferences<br>- reflective practice                                                                | Exercise physiology<br>Nutrition and dietetics<br>Occupational therapy<br>Pharmacy<br>Podiatry                                   |

| Author                                                                                                                                                                                                                                                                                                                                                                                        | Country       | Literature Typology<br>(methodological approach, if applicable)       | Purpose or Aim of Article                                                                                                                                                                                                                                                  | Setting(s)<br>IPP Education Approach/<br>Strategies                                                                                                                                                                                                                               | Student Disciplines Involved                                                                  |
|-----------------------------------------------------------------------------------------------------------------------------------------------------------------------------------------------------------------------------------------------------------------------------------------------------------------------------------------------------------------------------------------------|---------------|-----------------------------------------------------------------------|----------------------------------------------------------------------------------------------------------------------------------------------------------------------------------------------------------------------------------------------------------------------------|-----------------------------------------------------------------------------------------------------------------------------------------------------------------------------------------------------------------------------------------------------------------------------------|-----------------------------------------------------------------------------------------------|
|                                                                                                                                                                                                                                                                                                                                                                                               |               |                                                                       |                                                                                                                                                                                                                                                                            |                                                                                                                                                                                                                                                                                   | Social work                                                                                   |
| <p>Fries, K. S., Bowers, D. M., Gross, M., &amp; Frost, L. (2013). Service learning in Guatemala: using qualitative content analysis to explore an interdisciplinary learning experience among students in health care professional programs. <i>Journal of Multidisciplinary Healthcare</i>, 6, 45-52.</p> <p>DOI: <a href="https://doi.org/10.2147/JMDH.S35867">10.2147/JMDH.S35867</a></p> | United States | Primary research (Qualitative – inductive approach; content analysis) | The aim of this article was to describe the experiences of students in health care professional programs from nursing, occupational, and physical therapy disciplines as they collaborated to provide health care to marginalized Guatemalan citizens over a 7-day period. | <p><i>Community and primary care</i></p> <ul style="list-style-type: none"> <li>- debrief sessions</li> <li>- provide supervised health care in IP triad groups</li> <li>- reflective learning through journaling</li> </ul>                                                      | <p>Nursing</p> <p>Occupational therapy</p> <p>Physical therapy</p>                            |
| <p>Garcia, J. D., &amp; Frank, R. A. (2016). Nontraditional approach for interprofessional service learning in a doctor of physical therapy program: The Farm Worker Family Health Program. <i>Frontiers in Communication</i>, 1.</p> <p>DOI: <a href="https://doi.org/10.3389/fcomm.2016.00012">10.3389/fcomm.2016.00012</a></p>                                                             | United States | Program description                                                   | The purpose of the article was to describe the program and identify aspects of that may be impactful for enhancing skills of communication, cultural competency, and interprofessional collaboration for student physical therapists.                                      | <p><i>Farm Worker Family Health Program (rural)</i></p> <ul style="list-style-type: none"> <li>- work in IP groups to assess and screen patients</li> <li>- use case studies to problem solve with peers</li> <li>- engage in group activities and personal reflection</li> </ul> | <p>Nursing</p> <p>Pharmacy</p> <p>Physical therapy</p> <p>Psychology</p> <p>Public health</p> |
| <p>Gentry, C., Espiritu, E., Schorn, M. N., Hallmark, B., Bryan, M., Prather, P., Villalta-Gill, V., Offodile, R., &amp; Wilkins, C. (2021). Engaging the</p>                                                                                                                                                                                                                                 | United States | Primary research (Mixed methods)                                      | This article described a longitudinal collaborative interinstitutional IPE project that included students from five                                                                                                                                                        | <p><i>Not applicable</i></p> <ul style="list-style-type: none"> <li>- didactic sessions</li> </ul>                                                                                                                                                                                | <p>Dentistry</p> <p>Medicine</p> <p>Nursing</p>                                               |

| Author                                                                                                                                                                                                                                                                                                                                                       | Country       | Literature Typology (methodological approach, if applicable) | Purpose or Aim of Article                                                                                                                                                                                                                                                           | Setting(s) IPP Education Approach/ Strategies                                                                                          | Student Disciplines Involved                                                                                                                   |
|--------------------------------------------------------------------------------------------------------------------------------------------------------------------------------------------------------------------------------------------------------------------------------------------------------------------------------------------------------------|---------------|--------------------------------------------------------------|-------------------------------------------------------------------------------------------------------------------------------------------------------------------------------------------------------------------------------------------------------------------------------------|----------------------------------------------------------------------------------------------------------------------------------------|------------------------------------------------------------------------------------------------------------------------------------------------|
| <p>community through a longitudinal, interprofessional, interinstitutional experiential learning collaboration. <i>Currents in Pharmacy Teaching and Learning</i>, 13(2), 169-176.<br/>DOI: <a href="https://doi.org/10.1016/j.cptl.2020.09.012">10.1016/j.cptl.2020.09.012</a></p>                                                                          |               |                                                              | <p>institution and ten programs, in engaging community partners (CP) while delivering core IPE competencies.</p>                                                                                                                                                                    | <p>- project planning and implementation sessions<br/>- presentation to community partner</p>                                          | <p>Nutrition<br/>Occupational therapy<br/>Pharmacy<br/>Physical therapy<br/>Public health<br/>Social work<br/>Speech &amp; hearing program</p> |
| <p>Gordon, S., Lind, C., Hall, K., &amp; Baker, N. (2021). Attaining and assessing the Australian interprofessional learning competencies. <i>Journal of Interprofessional Care</i>, 35(2), 301-309.<br/>DOI: <a href="https://doi.org/10.1080/13561820.2020.1712335">10.1080/13561820.2020.1712335</a></p>                                                  | Australia     | Primary research (Qualitative)                               | <p>This paper presented the qualitative analysis of a mixed method study that evaluates students' experiences of the IPLCs during 'Inspiring Health,' a community-based interprofessional placement, and determines whether reflections can effectively assess IPLC attainment.</p> | <p><i>Community collaborative program</i><br/>- full medical history assessment<br/>- reflective writing</p>                           | <p>Audiology<br/>Clinical science<br/>Health science<br/>Nursing<br/>Physiotherapy<br/>Social work<br/>Speech pathology</p>                    |
| <p>Gruss, V., &amp; Hasnain, M. (2021). Building the future geriatrics workforce through transformative interprofessional education and community-engaged experiential learning. <i>Journal of Interprofessional Education &amp; Practice</i>, 22, 100389 .<br/>DOI: <a href="https://doi.org/10.1016/j.xjep.2020.100389">10.1016/j.xjep.2020.100389</a></p> | United States | Program evaluation                                           | <p>This paper describes the course structure, process and program evaluation findings from the initial years of implementation.</p>                                                                                                                                                 | <p><i>Senior Center, Sub-Acute in-patient Rehabilitation Hospital, House Calls program and Hospice and Palliative Care Center.</i></p> |                                                                                                                                                |

| Author                                                                                                                                                                                                                                                                                                                                                                                    | Country       | Literature Typology<br>(methodological approach, if applicable)        | Purpose or Aim of Article                                                                                                                                                                                                      | Setting(s)<br>IPP Education Approach/<br>Strategies                                                                                                                                                                                                                                                                              | Student Disciplines Involved                                           |
|-------------------------------------------------------------------------------------------------------------------------------------------------------------------------------------------------------------------------------------------------------------------------------------------------------------------------------------------------------------------------------------------|---------------|------------------------------------------------------------------------|--------------------------------------------------------------------------------------------------------------------------------------------------------------------------------------------------------------------------------|----------------------------------------------------------------------------------------------------------------------------------------------------------------------------------------------------------------------------------------------------------------------------------------------------------------------------------|------------------------------------------------------------------------|
|                                                                                                                                                                                                                                                                                                                                                                                           |               |                                                                        |                                                                                                                                                                                                                                | <ul style="list-style-type: none"> <li>- orientation to program</li> <li>- open discussions, discharge planning, end-of-life debate</li> <li>- assessments, home visits, and team care planning</li> <li>- reflection exercises</li> </ul>                                                                                       |                                                                        |
| <p>Gudmundsen, A. C., Norbye, B., Abrandt Dahlgren, M., &amp; Obstfelder, A. (2018). Interprofessional student meetings in municipal health service – Mutual learning towards a community of practice in patient care. <i>Journal of Interprofessional Care</i>, 33(1), 93-101.</p> <p>DOI: <a href="https://doi.org/10.1080/13561820.2018.1515732">10.1080/13561820.2018.1515732</a></p> | Norway        | Primary research<br>(Qualitative – ethnography)                        | This paper investigated how mutual engagement evolves in interprofessional student meetings when medical, nursing, occupational therapy and physiotherapy students shape their own collaboration and learning in patient care. | <p><i>Geriatric rehab, nursing homes and community health services in rural settings</i></p> <ul style="list-style-type: none"> <li>- IP collaboration in patient care</li> <li>- assigned in groups responsibility to deliver relevant health services</li> <li>- participate in patient reports and clinic meetings</li> </ul> | <p>Medicine<br/>Nursing<br/>Occupational therapy<br/>Physiotherapy</p> |
| <p>Hallas, D., Fernandez, J. B., Herman, N. G., &amp; Moursi, A. (2015). Identification of pediatric oral health core competencies through interprofessional education and</p>                                                                                                                                                                                                            | United States | Primary research<br>(Quantitative – nonexperimental descriptive study) | The purpose of this paper was to describe the design, implementation, and evaluation of dental and nursing interprofessional educational                                                                                       | <p><i>Primary care clinics</i></p> <ul style="list-style-type: none"> <li>- case presentation</li> <li>- case studies</li> </ul>                                                                                                                                                                                                 | <p>Dental students<br/>Pediatric dental residents</p>                  |

| Author                                                                                                                                                                                                                                                                                                                                                                                            | Country              | Literature Typology<br>(methodological approach, if applicable)      | Purpose or Aim of Article                                                                                                                                                                                                                                                                                                          | Setting(s)<br>IPP Education Approach/<br>Strategies                                                                                                                                                                                    | Student Disciplines Involved                                                                                                                         |
|---------------------------------------------------------------------------------------------------------------------------------------------------------------------------------------------------------------------------------------------------------------------------------------------------------------------------------------------------------------------------------------------------|----------------------|----------------------------------------------------------------------|------------------------------------------------------------------------------------------------------------------------------------------------------------------------------------------------------------------------------------------------------------------------------------------------------------------------------------|----------------------------------------------------------------------------------------------------------------------------------------------------------------------------------------------------------------------------------------|------------------------------------------------------------------------------------------------------------------------------------------------------|
| <p>practice. <i>Nursing Research and Practice</i>, 2015, 360523.<br/>DOI: <a href="https://doi.org/10.1155/2015/360523">10.1155/2015/360523</a></p>                                                                                                                                                                                                                                               |                      |                                                                      | <p>activities designed to accomplish these goals.</p>                                                                                                                                                                                                                                                                              |                                                                                                                                                                                                                                        | <p>Pediatric nurse practitioners</p>                                                                                                                 |
| <p>Hartnett, E., Haber, J., Catapano, P., Dougherty, N., Moursi, A. M., Kashani, R., Osman, C., Chinn, C., &amp; Bella, A. (2019). The impact of an interprofessional pediatric oral health clerkship on advancing interprofessional education outcomes. <i>Journal of Dental Education</i>, 83(8), 878-886.<br/>DOI: <a href="https://doi.org/10.21815/JDE.019.088">10.21815/JDE.019.088</a></p> | <p>United States</p> | <p>Program evaluation<br/>(Quantitative)</p>                         | <p>The aim of this study was to evaluate the effectiveness of an innovative pediatric interprofessional education clinical experience using oral-systemic health as the clinical population example for improving the self-reported interprofessional competencies of family nurse practitioner, dental, and medical students.</p> | <p><i>Primary care clinics</i><br/>- clinical teams of students with trained pediatric dental residents<br/>- pre-conference briefing<br/>- collaboration in management plan and well-child visit<br/>- post-conference debriefing</p> | <p>Dental students<br/>Family nurse practitioner<br/>Medical students</p>                                                                            |
| <p>Hayward, K. S., Kochniuk, L., Powell, L., &amp; Peterson, T. (2005). Changes in students' perceptions of interdisciplinary practice reaching the older adult through mobile service delivery. <i>Journal of Allied Health</i>, 34(4), 192-198.<br/>DOI: no doi</p>                                                                                                                             | <p>United States</p> | <p>Primary research<br/>(Quantitative – pretest/posttest design)</p> | <p>This article examined students' perceptions of interdisciplinary health care practice in a facilitated, community-based practicum experience.</p>                                                                                                                                                                               | <p><i>Rural community outreach</i><br/>- group work<br/>- development of educational sessions</p>                                                                                                                                      | <p>Dietetics<br/>Health education<br/>Nursing<br/>Occupational therapy<br/>Pharmacy<br/>Physical therapy<br/>Physician assistant<br/>Social work</p> |



| Author                                                                                                                                                                                                                                                                                                                         | Country       | Literature Typology<br>(methodological approach, if applicable) | Purpose or Aim of Article                                                                                                                                                                                                                                                                             | Setting(s)<br>IPP Education Approach/<br>Strategies                                                                                                        | Student Disciplines Involved                                                                                       |
|--------------------------------------------------------------------------------------------------------------------------------------------------------------------------------------------------------------------------------------------------------------------------------------------------------------------------------|---------------|-----------------------------------------------------------------|-------------------------------------------------------------------------------------------------------------------------------------------------------------------------------------------------------------------------------------------------------------------------------------------------------|------------------------------------------------------------------------------------------------------------------------------------------------------------|--------------------------------------------------------------------------------------------------------------------|
| Heath, J., Aker, R., Feld, H., Singer, R. L., & Norton, J. (2019). A pilot interprofessional program to promote oral health and wellness in Appalachian children. <i>Journal of Professional Nursing</i> , 35(5), 412-416.<br>DOI: <a href="https://doi.org/10.1016/j.profnurs.2019.02.006">10.1016/j.profnurs.2019.02.006</a> | United States | Primary research<br>(Quantitative – pretest/posttest design)    | The aim of this article was to describe the outcomes from this innovative immersion experience to help bridge the gap with IPE and clinical practice in underserved communities through an academic-clinical partnership between seven health profession colleges.                                    | <i>Elementary schools</i><br>- direct care provision<br>- reflection                                                                                       | Dentistry<br>Health communication<br>Nursing<br>Pharmacy<br>Physical therapy<br>Public health<br>Social work       |
| Hoover, M., & Andazola, J. (2012). Integrated behavioral care training in family practice residency: Opportunities and challenges. <i>Journal of Clinical Psychology in Medical Settings</i> , 19(4), 446-450.<br>DOI: <a href="https://doi.org/10.1007/s10880-012-9353-9">10.1007/s10880-012-9353-9</a>                       | United States | Program description                                             | The paper described a family practice residency program that trains family medicine residents, prescribing psychology students, and pre-doctoral and post-doctoral behavioral health consultants.                                                                                                     | <i>Health center</i><br>- groupwork<br>- presentation                                                                                                      | Counselling psychology doctoral students<br>Family medicine residents<br>Prescribing psychology practicum students |
| Hu, T., Cox, K. A., & Nyhof-Young, J. (2018). Investigating student perceptions at an interprofessional student-run free clinic serving marginalised populations. <i>Journal of Interprofessional Care</i> , 32(1), 75-79.<br>DOI: <a href="https://doi.org/10.1080/13561820.2017.1363724">10.1080/13561820.2017.1363724</a>   | Canada        | Primary research<br>(Mixed methods)                             | The aim of this study was to evaluate the learning experiences and skills developed among interprofessional healthcare students at an SRFC serving marginalised populations, in order to provide data for ongoing programme improvement and recommendations for other SRFCs based on lessons learned. | <i>Community health centre</i><br>- groupwork<br>- students from different disciplines paired for client interview and examination<br>- reflection session | Medicine<br>Nursing<br>Pharmacy<br>Physiotherapy<br>Social work                                                    |

| Author                                                                                                                                                                                                                                                                                                                                                         | Country | Literature Typology<br>(methodological approach, if applicable) | Purpose or Aim of Article                                                                                                                                                                                                                                                                                                                                | Setting(s)<br>IPP Education Approach/<br>Strategies                             | Student Disciplines Involved |
|----------------------------------------------------------------------------------------------------------------------------------------------------------------------------------------------------------------------------------------------------------------------------------------------------------------------------------------------------------------|---------|-----------------------------------------------------------------|----------------------------------------------------------------------------------------------------------------------------------------------------------------------------------------------------------------------------------------------------------------------------------------------------------------------------------------------------------|---------------------------------------------------------------------------------|------------------------------|
| <p>Jackman, D., Yonge, O., Myrick, F., Janke, F., &amp; Konkin, J. (2016). A rural interprofessional educational initiative: What success looks like. <i>Online Journal of Rural Nursing and Health Care</i>, 16(2), 5-26.</p> <p>DOI: <a href="https://doi.org/10.14574/ojrnhc.v16i2.417">10.14574/ojrnhc.v16i2.417</a></p>                                   | Canada  | Primary research<br>(Qualitative – Glaserian grounded theory)   | This article was an exploration of how participants defined a successful rural IPE experience, and which factors promoted or hindered that success.                                                                                                                                                                                                      | <i>Rural community hospital</i><br>- clinical placement<br>- clinical rounds    | Medicine<br>Nursing          |
| <p>Jakobsen, F., Mørcke, A. M., Hansen, T. B. (2017). The interprofessional learning experience: Findings from a qualitative study based in an outpatient setting. <i>Journal of Interprofessional Care</i>, 31(5), 613-619.</p> <p>DOI: <a href="https://doi.org/10.1080/13561820.2017.1322560">10.1080/13561820.2017.1322560</a></p>                         | Denmark | Primary research<br>(Case study)                                | The purpose of this article was to enhance understanding of interprofessional learning during which students take care of authentic patients and acquire relevant learning experiences in an outpatient clinic setting with a pedagogical approach based on adult learning methods.                                                                      | <i>Outpatient clinic</i><br>- direct care provision<br>- reflective supervision | Medicine<br>Nursing          |
| <p>Jakobsen, F., Musaeus, P., Kirkeby, L., Hanse, T. B., &amp; Mørcke, A. M. (2019). Emotions and clinical learning in an interprofessional outpatient clinic: a focused ethnographic study. <i>Journal of Interprofessional Care</i>, 33(1), 57-65.</p> <p>DOI: <a href="https://doi.org/10.1080/13561820.2018.1514372">10.1080/13561820.2018.1514372</a></p> | Denmark | Primary research<br>(Qualitative – ethnography)                 | The aim of this study was first to investigate the self-reported and the observed relationship of the four types of emotion: activity, outcome, epistemic and social emotions. Second to analyse the valence and activation of these types of emotions and their role in medical and nursing students' learning in a clinical interprofessional context. | <i>Outpatient clinic</i><br>- direct care provision<br>- reflective supervision | Medicine<br>Nursing          |

| Author                                                                                                                                                                                                                                                                                                                                                 | Country       | Literature Typology<br>(methodological approach, if applicable) | Purpose or Aim of Article                                                                                                                                                                                                                | Setting(s)<br>IPP Education Approach/<br>Strategies                                                                                                     | Student Disciplines Involved                         |
|--------------------------------------------------------------------------------------------------------------------------------------------------------------------------------------------------------------------------------------------------------------------------------------------------------------------------------------------------------|---------------|-----------------------------------------------------------------|------------------------------------------------------------------------------------------------------------------------------------------------------------------------------------------------------------------------------------------|---------------------------------------------------------------------------------------------------------------------------------------------------------|------------------------------------------------------|
| <p>Janotha, B. L., Tamari, K., &amp; Evangelidis-Sakellson, V. (2019). Dental and nurse practitioner student attitudes about collaboration before and after interprofessional clinical experiences. <i>Journal of Dental Education</i>, 83(6), 638-644.</p> <p>DOI: <a href="https://doi.org/10.21815/JDE.019.073">10.21815/JDE.019.073</a></p>        | United States | Primary research<br>(Quantitative – pre/post-test survey)       | The aim of this study was to investigate the effect that an interprofessional clinical experience (IPCE) had on dental and adult-gerontology primary care nurse practitioner (NP) students' attitudes towards health care collaboration. | <p><i>Tertiary care center and dental clinic</i></p> <ul style="list-style-type: none"> <li>- direct care provision</li> <li>- IPP groupwork</li> </ul> | Dental student<br>Nurse practitioner                 |
| <p>Jentoft, R. (2021). Boundary-crossings among health students in interprofessional geropsychiatric outpatient practice: collaboration with elderly people living at home. <i>Journal of Interprofessional Care</i>, 35(3), 409-418.</p> <p>DOI: <a href="https://doi.org/10.1080/13561820.2020.1733501">10.1080/13561820.2020.1733501</a></p>        | Norway        | Primary research<br>(Qualitative – focused ethnography)         | The purpose of this article was to understand how learning is shaped by interaction across boundaries in a new boundary-crossing practice.                                                                                               | <p><i>Outpatient mental health center</i></p> <ul style="list-style-type: none"> <li>- seminars</li> <li>- direct care assessment</li> </ul>            | Medicine<br>Occupational therapy<br>Physical therapy |
| <p>Johnson, K. L., Fuji, K. T., Franco, J. V., Castillo, S., O'Brien, K., &amp; Begley, K. J. (2018). A pharmacist's role in a dental clinic: Establishing a collaborative and interprofessional education site. <i>Innovations in Pharmacy</i>, 9(4), 13.</p> <p>DOI: <a href="https://doi.org/10.24926/iip.v9i4.1382">10.24926/iip.v9i4.1382</a></p> | United States | Program description                                             | The purpose of this paper was to describe the development of a formal interprofessional care team consisting of dentists, dental students, a pharmacist, and pharmacy students in a university dental school clinic.                     | <p><i>Dental clinic</i></p> <ul style="list-style-type: none"> <li>- direct care provision</li> </ul>                                                   | Dentistry<br>Pharmacy                                |
| <p>Jones, A. C., Li, T., Zomorodi, M., Broadhurst, R., &amp; Weil, A. B. (2018). Straddling care and education:</p>                                                                                                                                                                                                                                    | United States | Program description                                             | The purpose of this paper was to describe the experience with an IP service-learning                                                                                                                                                     | <p><i>Hospital and community</i></p>                                                                                                                    | Chaplaincy<br>Medicine<br>Nursing                    |

| Author                                                                                                                                                                                                                                                                                                                                                                                           | Country               | Literature Typology (methodological approach, if applicable) | Purpose or Aim of Article                                                                                                                                    | Setting(s) IPP Education Approach/ Strategies                                                                                        | Student Disciplines Involved                                                                        |
|--------------------------------------------------------------------------------------------------------------------------------------------------------------------------------------------------------------------------------------------------------------------------------------------------------------------------------------------------------------------------------------------------|-----------------------|--------------------------------------------------------------|--------------------------------------------------------------------------------------------------------------------------------------------------------------|--------------------------------------------------------------------------------------------------------------------------------------|-----------------------------------------------------------------------------------------------------|
| <p>developing interprofessional collaboration through a hotspotting service learning project. <i>Healthcare</i>, 6(2), 108-109.</p> <p>DOI: <a href="https://doi.org/10.1016/j.hjdsi.2018.02.001">10.1016/j.hjdsi.2018.02.001</a></p>                                                                                                                                                            |                       |                                                              | <p>hotspotting project, with also discussing the goals, interventions, achievement, challenges and perspective on scaling and sustaining these programs.</p> | <p>- direct care provision<br/>- assessments</p>                                                                                     | <p>Pharmacy<br/>Physician assistant<br/>Public health<br/>Social work<br/>Undergraduate studies</p> |
| <p>Joseph, S., Diack, L., Garton, F., &amp; Haxton, J. (2012). Interprofessional education in practice. <i>The Clinical Teacher</i>, 9(1), 27-31.</p> <p>DOI: <a href="https://doi.org/10.1111/j.1743-498X.2011.00486.x">10.1111/j.1743-498X.2011.00486.x</a></p>                                                                                                                                | <p>United Kingdom</p> | <p>Primary research (Quantitative)</p>                       | <p>This article aimed to ascertain attitudinal change experienced by students undertaking IPE in clinical practice.</p>                                      | <p><i>Primary care centre</i><br/>- case observations<br/>- case presentation</p>                                                    | <p>Medicine<br/>Nursing<br/>Occupational therapy<br/>Pharmacy<br/>Social work</p>                   |
| <p>Kent, F., Francis-Cracknell, A., McDonald, R., Newton, J. M., Keating, J. L., &amp; Dodic, M. (2016). How do interprofessional student teams interact in a primary care clinic? A qualitative analysis using activity theory. <i>Advances in Health Sciences Education</i>, 21(4), 749-760.</p> <p>DOI: <a href="https://doi.org/10.1007/s10459-015-9663-4">10.1007/s10459-015-9663-4</a></p> | <p>Australia</p>      | <p>Primary research (Qualitative – ethnography)</p>          | <p>The aim of this paper was to investigate what and how students from differing professions learn together.</p>                                             | <p><i>Primary care and residential care</i><br/>- groupwork<br/>- direct care provision<br/>- case presentation<br/>- reflection</p> | <p>Medicine<br/>Nursing<br/>Occupational therapy<br/>Pharmacy<br/>Physiotherapy</p>                 |
| <p>Kipp, J., Pimlott, J. F., &amp; Satzinger, F. (2007). Universities preparing health professionals for the 21st century: can something new come out of the traditional establishment? <i>Journal of</i></p>                                                                                                                                                                                    | <p>Canada</p>         | <p>Program evaluation (Mixed methods)</p>                    | <p>An aim/purpose of article was not explicitly stated. Authors provided a description and background for an Enhancing Clinical Capacity Project Fund</p>    | <p><i>Unclear</i><br/>- interdisciplinary team placements</p>                                                                        | <p>Medicine<br/>Nursing<br/>Nutrition<br/>Pharmacy</p>                                              |

| Author                                                                                                                                                                                                                                                                                                            | Country       | Literature Typology (methodological approach, if applicable) | Purpose or Aim of Article                                                                                                                                                                                                       | Setting(s) IPP Education Approach/ Strategies                                                  | Student Disciplines Involved                                                 |
|-------------------------------------------------------------------------------------------------------------------------------------------------------------------------------------------------------------------------------------------------------------------------------------------------------------------|---------------|--------------------------------------------------------------|---------------------------------------------------------------------------------------------------------------------------------------------------------------------------------------------------------------------------------|------------------------------------------------------------------------------------------------|------------------------------------------------------------------------------|
| <p><i>Interprofessional Care</i>, 21(6), 633-644.<br/>DOI: <a href="https://doi.org/10.1080/13561820701697844">10.1080/13561820701697844</a></p>                                                                                                                                                                  |               |                                                              | project that established student team placements within a chronic disease model for diabetic services.                                                                                                                          |                                                                                                |                                                                              |
| <p>Kostoff, M. D., &amp; Shin, T. R. (2016). Integration of pharmacy students into family medicine residency clinics. <i>Family Medicine</i>, 48(10), 805-808.<br/>DOI: no doi</p>                                                                                                                                | United States | Primary research (Mixed methods)                             | The purpose of this study was to determine the impact of pharmacy student integration into a family medicine residency clinic on family medicine residents' attitudes toward interprofessional collaboration and satisfaction.  | <i>Primary care clinic</i><br>- direct care provision<br>- groupwork                           | Family medicine residents<br>Pharmacy                                        |
| <p>Kuder, L. C., Gairola, G. A., &amp; Hamilton, C. C. (2001). Development of rural interdisciplinary geriatrics teams. <i>Gerontology &amp; Geriatrics Education</i>, 21(4), 65-79.<br/>DOI: <a href="https://doi.org/10.1300/J021v21n04_06">10.1300/J021v21n04_06</a></p>                                       | United States | Program description                                          | This article described a project to develop interdisciplinary geriatrics teams and student training sites in rural Appalachian primary care settings.                                                                           | <i>Primary care clinic</i><br>- direct care provision<br>- assessments<br>- case conferences   | Allied health<br>Dentistry<br>Medicine<br>Nursing<br>Pharmacy<br>Social work |
| <p>Lai, C. J., Nye, H. E., Bookwalter, T., Kwan, A., &amp; Hauer, K. E. (2008). Postdischarge follow-up visits for medical and pharmacy students on an inpatient medicine clerkship. <i>Journal of Hospital Medicine</i>, 3(1), 20-27.<br/>DOI: <a href="https://doi.org/10.1002/jhm.264">10.1002/jhm.264</a></p> | United States | Primary research (Quantitative – pre/post survey)            | The purpose of the study was to assess the impact of this didactic and experiential curriculum on students' attitudes and self-assessed skills in the interdisciplinary care and transitional care of chronically ill patients. | <i>Tertiary university hospital</i><br>- groupwork<br>- care provision<br>- debriefing session | Medicine<br>Pharmacy                                                         |

| Author                                                                                                                                                                                                                                                                                                                                                                                                   | Country | Literature Typology<br>(methodological approach, if applicable) | Purpose or Aim of Article                                                                                                                                                                                                                                                                         | Setting(s)<br>IPP Education Approach/<br>Strategies                                                                                                                                                                                      | Student Disciplines Involved                                                                                                                                              |
|----------------------------------------------------------------------------------------------------------------------------------------------------------------------------------------------------------------------------------------------------------------------------------------------------------------------------------------------------------------------------------------------------------|---------|-----------------------------------------------------------------|---------------------------------------------------------------------------------------------------------------------------------------------------------------------------------------------------------------------------------------------------------------------------------------------------|------------------------------------------------------------------------------------------------------------------------------------------------------------------------------------------------------------------------------------------|---------------------------------------------------------------------------------------------------------------------------------------------------------------------------|
| <p>Lauckner, H. M., Nickerson Rak, C., Hickey, E. M., Isenor, J. E., &amp; Godden-Webster, A. L. (2018). Interprofessional and collaborative care planning activities for students and staff within an academic nursing home. <i>Journal of Interprofessional Education &amp; Practice</i>, 13, 1-4.</p> <p>DOI: <a href="https://doi.org/10.1016/j.xjep.2018.07.005">10.1016/j.xjep.2018.07.005</a></p> | Canada  | Primary research<br>(Quantitative – not specified)              | An aim/purpose of article was not explicitly stated. Authors described interprofessional team experiences in an academic nursing home, and discussed the IPE curriculum and student outcome.                                                                                                      | <p><i>Academic nursing home</i></p> <ul style="list-style-type: none"> <li>- weekly facilitated meetings to conduct assessments and develop care plans</li> <li>- shadowing providers</li> <li>- participate in team meetings</li> </ul> | <p>Dietetics</p> <p>Nurse practitioners</p> <p>Occupational therapy</p> <p>Pharmacy</p> <p>Speech-language pathology</p> <p>Social Work</p> <p>Therapeutic recreation</p> |
| <p>Lidskog, M., Löfmark, A., &amp; Ahlström, G. (2009). Learning through participating on an interprofessional training ward. <i>Journal of Interprofessional Care</i>, 23(5), 486-497.</p> <p>DOI: <a href="https://doi.org/10.1080/13561820902921878">10.1080/13561820902921878</a></p>                                                                                                                | Sweden  | Primary research<br>(Case study)                                | The aim of this study was to describe and analyse the students' learning on an interprofessional training ward within care for older persons through focusing on the students' ways of participating in the community of practice on the ward. Learning through participating on a training ward. | <p><i>Nursing home</i></p> <ul style="list-style-type: none"> <li>- groupwork in IPP teams</li> <li>- direct care provision</li> </ul>                                                                                                   | <p>Nursing</p> <p>Occupational therapy</p> <p>Social work</p>                                                                                                             |
| <p>Mann, K. V., Mcfetridge-Durdle, J., Martin-Misener, R., Clovis, J., Rowe, R., Beanlands, H., &amp; Sarria, M. (2009). Interprofessional education for students of the health professions: The "Seamless Care" model. <i>Journal</i></p>                                                                                                                                                               | Canada  | Program description                                             | This paper aimed to describe the Seamless Care model of interprofessional education and discusses the theoretical underpinnings of this experiential model of                                                                                                                                     | <p><i>Quaternary-care hospital</i></p> <ul style="list-style-type: none"> <li>- IPP groupwork</li> <li>- development of patient care plan</li> </ul>                                                                                     | <p>Dental hygiene</p> <p>Dentistry</p> <p>Medicine</p> <p>Nursing</p> <p>Pharmacy</p>                                                                                     |

| Author                                                                                                                                                                                                                                                                                                                                                                                                                                                | Country        | Literature Typology<br>(methodological approach, if applicable) | Purpose or Aim of Article                                                                                                                                                                                                                                                                              | Setting(s)<br>IPP Education Approach/<br>Strategies                                                                                                                                                                                                                                                   | Student Disciplines Involved                                               |
|-------------------------------------------------------------------------------------------------------------------------------------------------------------------------------------------------------------------------------------------------------------------------------------------------------------------------------------------------------------------------------------------------------------------------------------------------------|----------------|-----------------------------------------------------------------|--------------------------------------------------------------------------------------------------------------------------------------------------------------------------------------------------------------------------------------------------------------------------------------------------------|-------------------------------------------------------------------------------------------------------------------------------------------------------------------------------------------------------------------------------------------------------------------------------------------------------|----------------------------------------------------------------------------|
| <p><i>of Interprofessional Care</i>, 23(3), 224-233.<br/>DOI: <a href="https://doi.org/10.1080/13561820802697735">10.1080/13561820802697735</a></p>                                                                                                                                                                                                                                                                                                   |                |                                                                 | interprofessional education designed to extend classroom-based interprofessional education to the clinical setting.                                                                                                                                                                                    | <ul style="list-style-type: none"> <li>- interprofessional modules</li> <li>- reflective exercise</li> </ul>                                                                                                                                                                                          |                                                                            |
| <p>Mattison, D., Smith, L. J., Balzer, K., Bavireddy, V., Bishop, T. W., Farris, K., Fitzgerald, M., Rulli, D., Trupiano, N., &amp; Anderson, O. S. (2023). Longitudinal Interprofessional Family Based Experience (LIFE): An authentic experiential interprofessional education learning framework. <i>Pedagogy in Health Promotion</i>, 9(1), 45-53.<br/>DOI: <a href="https://doi.org/10.1177/23733799211060726">10.1177/23733799211060726</a></p> | United States  | Program evaluation<br>(Quantitative)                            | This paper introduced the conceptual framework of an unique IPE experiential opportunity that moved beyond a one time intervention and use of cases or simulated patients, to a longitudinal experience with innovative collaborations that engage real patients and families in the learning process. | <i>Community-based virtual visits (Zoom)</i> <ul style="list-style-type: none"> <li>- pre-work and kick-off event</li> <li>team visits with patient/family through Zoom</li> <li>- team debriefings after patient-family meetings</li> <li>- wrap-up session with reflection on experience</li> </ul> | Dentistry<br>Health science<br>Kinesiology<br>Public health<br>Social work |
| <p>McCombe, J., Develin, D., &amp; Mallik, M. (2008). Creating interprofessional learning capacity in children's centres – description and evaluation of a pilot project. <i>Learning in Health and Social Care</i>, 7(4), 235-246.<br/>DOI: <a href="https://doi.org/10.1111/j.1473-6861.2008.00199.x">10.1111/j.1473-6861.2008.00199.x</a></p>                                                                                                      | United Kingdom | Program description                                             | This article described the setting up, implementation and evaluation of a pilot project to ensure a focus on interprofessional learning for all undergraduate/pre-registration students of health and social care accessing placement learning in children's centres.                                  | <i>Community children center</i> <ul style="list-style-type: none"> <li>- workshops</li> </ul>                                                                                                                                                                                                        | Nursing<br>Social work                                                     |

| Author                                                                                                                                                                                                                                                                                                                                                                                                                 | Country       | Literature Typology (methodological approach, if applicable)      | Purpose or Aim of Article                                                                                                                                                                                                                                                                                                         | Setting(s) IPP Education Approach/ Strategies                                                                                                                                  | Student Disciplines Involved                                  |
|------------------------------------------------------------------------------------------------------------------------------------------------------------------------------------------------------------------------------------------------------------------------------------------------------------------------------------------------------------------------------------------------------------------------|---------------|-------------------------------------------------------------------|-----------------------------------------------------------------------------------------------------------------------------------------------------------------------------------------------------------------------------------------------------------------------------------------------------------------------------------|--------------------------------------------------------------------------------------------------------------------------------------------------------------------------------|---------------------------------------------------------------|
| <p>McElfish, P. A., Moore, R., Buron, B., Hudson, J., Long, C. R., Purvis, R. S., Schulz, T. K., Rowland, B., &amp; Warmack, T. S. (2018). Integrating interprofessional education and cultural competency training to address health disparities. <i>Teaching and Learning in Medicine</i>, 30(2), 213-222.</p> <p>DOI: <a href="https://doi.org/10.1080/10401334.2017.1365717">10.1080/10401334.2017.1365717</a></p> | United States | Primary research (Mixed methods)                                  | This article presented an evaluation of an innovative pilot program that combined IPE and cultural competency learning opportunities through (a) educational seminars, (b) clinical experiential learning in a studentled clinic, and (c) community-based service-learning through health assessments and survey research events. | <i>Student-led clinic</i><br>- educational seminars<br>- clinical experiential learning in student-led clinic<br>- community-based service learning<br>- direct care provision | Medicine<br>Nursing<br>Pharmacy<br>Radiologic imaging science |
| <p>McNair, R., Brown, R., Stone, N., &amp; Sims, J. (2001). Rural interprofessional education: promoting teamwork in primary health care education and practice. <i>The Australian Journal of Rural Health</i>, 9(Suppl 1), S19-S26.</p> <p>DOI: <a href="https://doi.org/10.1046/j.1440-1584.9.s1.9.x">10.1046/j.1440-1584.9.s1.9.x</a></p>                                                                           | Australia     | Program description                                               | The present paper describes the context for an evolving interprofessional education project in rural primary care, designed to promote collaboration.                                                                                                                                                                             | <i>Rural community health center</i><br>- community engagement<br>- case presentation<br>- structured debriefing<br>- reflective discussion                                    | Medicine<br>Nursing                                           |
| <p>McNair, R., Stone, N., Sims, J., &amp; Curtis, C. (2005). Australian evidence for interprofessional education contributing to effective teamwork preparation and interest in rural practice. <i>Journal of Interprofessional Care</i>, 19(6), 579-594.</p>                                                                                                                                                          | Australia     | Primary research (Quantitative – before/after quasi-experimental) | This paper outlined the educational model, of a pilot placement for undergraduate health care professional students in rural Victoria, Australia, then focuses on the evaluation                                                                                                                                                  | <i>Rural community health center</i><br>- clinical placement<br>- discussion forum<br>- action-based learning                                                                  | Medicine<br>Nursing<br>Pharmacy<br>Physiotherapy              |



| Author                                                                                                                                                                                                                                                                                                                                                                                                                                                                                           | Country       | Literature Typology<br>(methodological approach, if applicable)      | Purpose or Aim of Article                                                                                                                                                                                     | Setting(s)<br>IPP Education Approach/<br>Strategies                                                                                                                    | Student Disciplines Involved                                                                                    |
|--------------------------------------------------------------------------------------------------------------------------------------------------------------------------------------------------------------------------------------------------------------------------------------------------------------------------------------------------------------------------------------------------------------------------------------------------------------------------------------------------|---------------|----------------------------------------------------------------------|---------------------------------------------------------------------------------------------------------------------------------------------------------------------------------------------------------------|------------------------------------------------------------------------------------------------------------------------------------------------------------------------|-----------------------------------------------------------------------------------------------------------------|
| DOI: <a href="https://doi.org/10.1080/13561820500412452">10.1080/13561820500412452</a>                                                                                                                                                                                                                                                                                                                                                                                                           |               |                                                                      | methods and results obtained from student evaluations.                                                                                                                                                        | - case presentation                                                                                                                                                    |                                                                                                                 |
| Mecca, M. C., Thomas, J. M., Niehoff, K. M., Hyson, A., Jeffery, S. M., Sellinger, J., Mecca, A. P., Van Ness, P. H., Fried, T. R., & Brienza, R. (2019). Assessing an interprofessional polypharmacy and deprescribing educational intervention for primary care post-graduate trainees: a quantitative and qualitative evaluation. <i>Journal of General Internal Medicine</i> , 34(7), 1220-1227.<br>DOI: <a href="https://doi.org/10.1007/s11606-019-04932-9">10.1007/s11606-019-04932-9</a> | United States | Primary research<br>(Mixed methods – exploratory, sequential design) | This article aimed to assess residents' knowledge of polypharmacy and perceptions of this interprofessional education intervention.                                                                           | <i>Primary care</i><br>- case conference<br>- direct care provision                                                                                                    | Internal medicine<br>Nurse practitioner                                                                         |
| Mihalynuk, T. V., Soule Odegarrd, P., Kang, R., Kedzierski, M., & Crowley, N. J. (2007). Partnering to enhance interprofessional service-learning innovations and addictions recovery. <i>Education for Health</i> , 20(3), 92.<br>DOI: no doi                                                                                                                                                                                                                                                   | United Staes  | Program description                                                  | This article described the creation and delivery of University of Washington- Adult Rehabilitation Center interprofessional service-learning innovations to enhance student learning and addictions recovery. | <i>Adult rehabilitation center</i><br>- weekly 3-hour on-site experience<br>- opportunities to work with ARC staff<br>- development of education modules and materials | Dentistry<br>Information sciences<br>Medicine<br>Nursing<br>Public health and community medicine<br>Social work |
| Miselis, H. H., Zawacki, S., White, S., Yinusa-Nyahkoon, L., Mostow, C., Furlong, J., Mott, K. K., Kumar, A.,                                                                                                                                                                                                                                                                                                                                                                                    | United States | Primary research<br>(Mixed methods)                                  | The goal of this paper was to report on a study of the impact of IPE in longitudinal priary care                                                                                                              | <i>Family medicine clinics</i>                                                                                                                                         | Medicine<br>Physician assistant                                                                                 |

| Author                                                                                                                                                                                                                                                                                                                                                                            | Country              | Literature Typology<br>(methodological approach, if applicable)                                  | Purpose or Aim of Article                                                                                                                                                                                        | Setting(s)<br>IPP Education Approach/<br>Strategies                                                                                                      | Student Disciplines Involved                                                                                                                                          |
|-----------------------------------------------------------------------------------------------------------------------------------------------------------------------------------------------------------------------------------------------------------------------------------------------------------------------------------------------------------------------------------|----------------------|--------------------------------------------------------------------------------------------------|------------------------------------------------------------------------------------------------------------------------------------------------------------------------------------------------------------------|----------------------------------------------------------------------------------------------------------------------------------------------------------|-----------------------------------------------------------------------------------------------------------------------------------------------------------------------|
| <p>Winter, M. R., Berklein, F., &amp; Jack, B. (2022). Interprofessional education in the clinical learning environment: a mixed-methods evaluation of a longitudinal experience in the primary care setting. <i>Journal of Interprofessional Care</i>, 36(6), 845-855.</p> <p>DOI: <a href="https://doi.org/10.1080/13561820.2022.2025768">10.1080/13561820.2022.2025768</a></p> |                      |                                                                                                  | <p>practices on trainees' interprofessional knowledge, attitudes, skills, and behaviors.</p>                                                                                                                     | <p>case-based didactic discussions</p> <ul style="list-style-type: none"> <li>- team huddles</li> <li>- patient visits</li> <li>- debriefings</li> </ul> | <p>Nutrition and dietetics</p> <p>Social work</p>                                                                                                                     |
| <p>Moreno-Vasquez, A., Gandara, E., Idar, A. Z., Recto, P., Zapata, J., &amp; Lesser, J. (2021). Developing and implementing a co-curricular IPE program: AHEC scholars program. <i>Public Health Nursing</i>, 38(6), 1080-1087.</p> <p>DOI: <a href="https://doi.org/10.1111/phn.12947">10.1111/phn.12947</a></p>                                                                | <p>United States</p> | <p>Primary research<br/>(Mixed methods – pre/post quasi-experimental; reflective journaling)</p> | <p>The purpose of this article is twofold: firstly, to present the process of the development and implementation of the AHEC Scholars Program; secondly, to present the outcomes from a 3-month pilot study.</p> | <p><i>Federally qualified health center</i></p> <ul style="list-style-type: none"> <li>- didactic work</li> <li>- direct care provision</li> </ul>       | <p>Dentistry</p> <p>Healthcare administration</p> <p>Medicine</p> <p>Nursing</p> <p>Pharmacy</p> <p>Public health (mentions other unspecified health professions)</p> |
| <p>Mpofu, R., Daniels, P. S., Adonis, T. A., &amp; Karuguti, W. M. (2014). Impact of an interprofessional education program on developing skilled graduates well-equipped to practise in rural and underserved areas. <i>Rural and Remote Health</i>, 14(3), 2671.</p>                                                                                                            | <p>South Africa</p>  | <p>Primary research<br/>(Mixed methods – questionnaire; focus groups)</p>                        | <p>This article reports on an investigation of the perceptions of students in an IPE program experience, and how their perceptions of this experience influenced their intention for</p>                         | <p><i>Rural and underserved community</i></p> <ul style="list-style-type: none"> <li>- groupwork</li> <li>- structured reflection</li> </ul>             | <p>Natural medicine</p> <p>Nursing</p> <p>Physiotherapy</p>                                                                                                           |

| Author                                                                                                                                                                                                                                                                                                                                                                                                     | Country       | Literature Typology<br>(methodological approach, if applicable)                                | Purpose or Aim of Article                                                                                                                                                                                                                                                                     | Setting(s)<br>IPP Education Approach/<br>Strategies                                                                               | Student Disciplines Involved                                                                                |
|------------------------------------------------------------------------------------------------------------------------------------------------------------------------------------------------------------------------------------------------------------------------------------------------------------------------------------------------------------------------------------------------------------|---------------|------------------------------------------------------------------------------------------------|-----------------------------------------------------------------------------------------------------------------------------------------------------------------------------------------------------------------------------------------------------------------------------------------------|-----------------------------------------------------------------------------------------------------------------------------------|-------------------------------------------------------------------------------------------------------------|
| DOI: <a href="https://doi.org/10.22605/RRH2671">10.22605/RRH2671</a>                                                                                                                                                                                                                                                                                                                                       |               |                                                                                                | future practice within rural South African communities.                                                                                                                                                                                                                                       | - case presentation                                                                                                               |                                                                                                             |
| Müller, J., & Couper, I. (2021). Preparing graduates for interprofessional practice in South Africa: The dissonance between learning and practice. <i>Frontiers in Public Health</i> , 9, 594894.<br>DOI: <a href="https://doi.org/10.3389/fpubh.2021.594894">10.3389/fpubh.2021.594894</a>                                                                                                                | South Africa  | Primary research<br>(Qualitative – interviews)                                                 | This paper reports on an explorative pilot study investigating students' and graduates' perceived value of their interprofessional home visit exposure in preparing them for working in South Africa.                                                                                         | <i>Home visits</i><br>- direct care provision<br>- reflection session                                                             | Human nutrition<br>Medicine<br>Occupational therapy<br>Physiotherapy<br>Speech language and hearing therapy |
| Nagelkerk, J., Thompson, M. E., Bouthillier, M., Tompkins, A., Baer, L. J., Trytko, J., Booth, A., Stevens, A., & Groeneveld, K. (2018). Improving outcomes in adults with diabetes through an interprofessional collaborative practice program. <i>Journal of Interprofessional Care</i> , 32(1), 4-13.<br>DOI: <a href="https://doi.org/10.1080/13561820.2017.1372395">10.1080/13561820.2017.1372395</a> | United States | Primary research<br>(Mixed methods – sequential design, pre-post questionnaires, focus groups) | The purpose of the research was to test the implementation of an IPCP program in a family practice FQHC that included interprofessional teams of students in the provision of care to determine if IPCP activities and student team members improved patient outcomes and staff productivity. | <i>Federally qualified health center</i><br>- IP groupwork<br>- direct care provision<br>- student-led classes<br>- daily huddles | Medicine<br>Pharmacy<br>Physician assistant                                                                 |
| Nagelkerk, J., Trytko, J., Baer, L. J., Tompkins, A., Thompson, M., Bouthillier, M., Booth, A., & Nord, C. (2021). Sustainability of an IPCP program within a federally qualified health center including interprofessional student team                                                                                                                                                                   | United States | Primary research<br>(Mixed methods – longitudinal design)                                      | The purpose of this article is to describe the continued implementation of The Midwest Interprofessional Practice, Education, and Research Center (MIPERC) IPCP program at CSHS, a family practice clinic                                                                                     | <i>Federally qualified health center</i><br>- IP groupwork<br>- direct care provision<br>- student-led classes                    | Medical assistant<br>Medicine<br>Nurse practitioner<br>Pharmacy<br>Physician assistant<br>Social work       |

| Author                                                                                                                                                                                                                                                                                                                                                                                                              | Country       | Literature Typology (methodological approach, if applicable)                                      | Purpose or Aim of Article                                                                                                                                                                                                                                                                                                                                      | Setting(s) IPP Education Approach/ Strategies                                                                                                                              | Student Disciplines Involved                                           |
|---------------------------------------------------------------------------------------------------------------------------------------------------------------------------------------------------------------------------------------------------------------------------------------------------------------------------------------------------------------------------------------------------------------------|---------------|---------------------------------------------------------------------------------------------------|----------------------------------------------------------------------------------------------------------------------------------------------------------------------------------------------------------------------------------------------------------------------------------------------------------------------------------------------------------------|----------------------------------------------------------------------------------------------------------------------------------------------------------------------------|------------------------------------------------------------------------|
| <p>placements. <i>Journal of Interprofessional Care</i>, 35(6), 869-877.<br/>DOI: <a href="https://doi.org/10.1080/13561820.2020.1816935">10.1080/13561820.2020.1816935</a></p>                                                                                                                                                                                                                                     |               |                                                                                                   | <p>within a Federally Qualified Health Center (FQHC), located in Grand Rapids, Michigan, and changes to the composition of interdisciplinary teams of students over two years.</p>                                                                                                                                                                             | <p>- daily huddles</p>                                                                                                                                                     |                                                                        |
| <p>Norbye, B. (2016). Healthcare students as innovative partners in the development of future healthcare services: An action research approach. <i>Nurse Education Today</i>, 46, 4-9.<br/>DOI: <a href="https://doi.org/10.1016/j.nedt.2016.06.021">10.1016/j.nedt.2016.06.021</a></p>                                                                                                                             | Norway        | <p>Primary research (Qualitative – action research, interviews, field notes, reflection logs)</p> | <p>This study aimed to explore how partnerships for the contextualisation of learning environments in community health services can contribute to the knowledge and requirements of new methods of working and also presents unintentional outcomes of interprofessional learning when student teams worked with patients selected by healthcare services.</p> | <p><i>Rural health services</i><br/>- IP groupwork<br/>- direct care provision<br/>- daily meetings</p>                                                                    | <p>Medicine<br/>Nursing<br/>Occupational therapy<br/>Physiotherapy</p> |
| <p>Normandin, C., Hayes, V., Cyr, P., &amp; Schirmer, J. (2023). Implementation and impact of an interprofessional education curriculum on medical, pharmacy, and social work students' attitudes, perceptions, and self-assessed teamwork skills. <i>Journal of Interprofessional Care</i>, 37(5), 846-850.<br/>DOI: <a href="https://doi.org/10.1080/13561820.2023.2169260">10.1080/13561820.2023.2169260</a></p> | United States | <p>Primary research (Quantitative)</p>                                                            | <p>An aim/purpose of article was not explicitly stated. Authors described the implementation and assessment of impact of a practice-based IPE curriculum involving direct patient care on student perceptions of competency and autonomy within their own profession, on attitudes toward the contributions and value of other</p>                             | <p><i>Residency training site, inpatient service, and a family medicine clinic</i><br/>- bi-weekly IP home visits<br/>- collaborative progress notes and 30-minute IPE</p> | <p>Medicine<br/>Pharmacy<br/>Social work</p>                           |

| Author                                                                                                                                                                                                                                                                                                                                        | Country     | Literature Typology (methodological approach, if applicable) | Purpose or Aim of Article                                                                                                                                                                                                                                                  | Setting(s) IPP Education Approach/ Strategies                                                                                | Student Disciplines Involved                                                                                                                             |
|-----------------------------------------------------------------------------------------------------------------------------------------------------------------------------------------------------------------------------------------------------------------------------------------------------------------------------------------------|-------------|--------------------------------------------------------------|----------------------------------------------------------------------------------------------------------------------------------------------------------------------------------------------------------------------------------------------------------------------------|------------------------------------------------------------------------------------------------------------------------------|----------------------------------------------------------------------------------------------------------------------------------------------------------|
|                                                                                                                                                                                                                                                                                                                                               |             |                                                              | professions and individual self-assessment of teamwork skills.                                                                                                                                                                                                             | discussion with faculty<br>- weekly IP interview of patient<br>- pre-interview huddle/post-intervention debrief              |                                                                                                                                                          |
| O'Brien, D., Swann, J., & Heap, N. (2015). Can the communities of practice model explain the complex organization of an interprofessional student-led health clinic? <i>Journal of Allied Health</i> , 44(1), e11-e16.<br>DOI: no doi                                                                                                         | New Zealand | Program description                                          | This paper outlined the organization of one such clinic (student-led university-based health clinic), and provides an insight to the processes by which IPCP and IPE are achieved in this setting. It explores the clinic using the CoP model as a framework for analysis. | <i>Community clinic</i><br>- weekly in-service sessions<br>- IPE tutorials<br>- case conferences                             | Counselling psychology<br>Nursing<br>Occupational therapy<br>Oral health<br>Physical therapy<br>Podiatry<br>Psychotherapy<br>Speech and language therapy |
| O'Carroll, V., Smith, J., Collinson, A., Jackson, C., & Ker, J. (2013). Interprofessional education for students' in primary care placements: Widening opportunities for accessible interprofessional learning. <i>Medical Science Educator</i> , 23(3), 405-410.<br>DOI: <a href="https://doi.org/10.1007/BF03341656">10.1007/BF03341656</a> | Scotland    | Program description                                          | This paper described an interprofessional activity which enables students to experience interprofessional learning and working within the primary care setting and to consider the impact of effective teamwork on patient safety.                                         | <i>Home visits through primary care practices</i><br>- worked paired in small teams<br>- planned and carried out home visits | Medicine<br>Nursing                                                                                                                                      |

| Author                                                                                                                                                                                                                                                                                                                                                                                  | Country       | Literature Typology<br>(methodological approach, if applicable) | Purpose or Aim of Article                                                                                                                                                | Setting(s)<br>IPP Education Approach/<br>Strategies                                                                                                                                | Student Disciplines Involved                                                                                                                                                       |
|-----------------------------------------------------------------------------------------------------------------------------------------------------------------------------------------------------------------------------------------------------------------------------------------------------------------------------------------------------------------------------------------|---------------|-----------------------------------------------------------------|--------------------------------------------------------------------------------------------------------------------------------------------------------------------------|------------------------------------------------------------------------------------------------------------------------------------------------------------------------------------|------------------------------------------------------------------------------------------------------------------------------------------------------------------------------------|
|                                                                                                                                                                                                                                                                                                                                                                                         |               |                                                                 |                                                                                                                                                                          | <ul style="list-style-type: none"> <li>- meetings with IPE coordinator and mentor for reflection and discussion</li> <li>- optional reflective piece</li> </ul>                    |                                                                                                                                                                                    |
| <p>Palmer, R. T., &amp; Stilp, C. (2017). Learning by doing: The MD-PA interprofessional education rural rotation. <i>Rural and Remote Health</i>, 17(1), 4167.</p> <p>DOI: <a href="https://doi.org/10.22605/rrh4167">10.22605/rrh4167</a></p>                                                                                                                                         | United States | Program description                                             | An aim/purpose of article was not explicitly stated. Authors provided a detailed description of the Combined Medical-Physician Assistant Student Rural Rotation program. | <i>Rural community engagement</i> <ul style="list-style-type: none"> <li>- community project</li> <li>- goal identification and reflection</li> <li>- case presentation</li> </ul> | Medicine<br>Physician assistant                                                                                                                                                    |
| <p>Philippon, D. J., Pimlott, J. F., King, S., Day, R. A., &amp; Cox, C. (2005). Preparing health science students to be effective health care team members: the interprofessional initiative at the university of Alberta. <i>Journal of Interprofessional Care</i>, 19(3), 195-206.</p> <p>DOI: <a href="https://doi.org/10.1080/13561820500126839">10.1080/13561820500126839</a></p> | Canada        | Program description                                             | This paper traced the evolution of the Interprofessional Initiative at the University of Alberta over the past decade and describes future directions.                   | <i>Specialty clinic and tertiary care center</i> <ul style="list-style-type: none"> <li>- IP groupwork</li> <li>- case conferences</li> </ul>                                      | Dentistry<br>Home economics<br>Kinesiology<br>Medical laboratory science<br>Medicine<br>Nursing<br>Nutrition & dietetics<br>Occupational therapy<br>Pharmacy<br>Physical education |

| Author                                                                                                                                                                                                                                                                                                                              | Country       | Literature Typology (methodological approach, if applicable) | Purpose or Aim of Article                                                                                                                                                                                                                   | Setting(s) IPP Education Approach/ Strategies                                                                                                                                             | Student Disciplines Involved                     |
|-------------------------------------------------------------------------------------------------------------------------------------------------------------------------------------------------------------------------------------------------------------------------------------------------------------------------------------|---------------|--------------------------------------------------------------|---------------------------------------------------------------------------------------------------------------------------------------------------------------------------------------------------------------------------------------------|-------------------------------------------------------------------------------------------------------------------------------------------------------------------------------------------|--------------------------------------------------|
|                                                                                                                                                                                                                                                                                                                                     |               |                                                              |                                                                                                                                                                                                                                             |                                                                                                                                                                                           | Physical therapy<br>Recreation & leisure studies |
| Pippitt, K., Moloney-Johns, A., Jalilbahabadi, S., & Gren, L. H. (2015). Collaboration versus competition: An interprofessional education experience. <i>Family medicine</i> , 47(4), 298-301.<br>DOI: no doi                                                                                                                       | United States | Program evaluation (Qualitative)                             | The purpose of this article was to assess student, preceptor, and patient satisfaction with a phased pilot project to introduce interprofessional education teams into a clinical setting.                                                  | <i>Outpatient clinics</i><br>- IP groupwork<br>- direct care provision<br>- debriefings                                                                                                   | Medicine<br>Physician assistant                  |
| Porcerelli, J. H., Fowler, S. L., Murdoch, W., Markova, T., & Kimbrough, C. (2013). Training family medicine residents to practice collaboratively with psychology trainees. <i>The International Journal of Psychiatry in Medicine</i> , 45(4), 357-365.<br>DOI: <a href="https://doi.org/10.2190/PM.45.4.f">10.2190/PM.45.4.f</a> | United States | Program description                                          | The purpose of this article was to describe a training curriculum for family medicine residents to practice collaboratively with psychology (doctoral) trainees at the Wayne State University/Crittenton Family Medicine Residency program. | <i>Outpatient clinic</i><br>- huddle<br>- shadowing<br>- co-counselling<br>- shared precepting<br>- lectures<br>- video-observation and feedback<br>- direct care provision<br>- projects | Medical residents<br>Psychology trainees         |
| Powell, K., Stocks, N., & Laurence, C. (2016). A new venture in interdisciplinary student learning in a co-located health service. <i>Australian Health Review</i> , 40(2), 205-209.                                                                                                                                                | Australia     | Primary research (Case study)                                | The purpose of this case study was to describe how the standard student placement experience ('shadowing' a practitioner) may be enhanced with a                                                                                            | <i>Primary care clinic</i><br>- case conferences<br>- informal discussions                                                                                                                | Counselling<br>Exercise physiology<br>Medicine   |

| Author                                                                                                                                                                                                                                                                                                                          | Country       | Literature Typology<br>(methodological approach, if applicable) | Purpose or Aim of Article                                                                                                                                                                                                                                                                                                                                                                                                                                                                                                                                                        | Setting(s)<br>IPP Education Approach/<br>Strategies                                           | Student Disciplines Involved                                                   |
|---------------------------------------------------------------------------------------------------------------------------------------------------------------------------------------------------------------------------------------------------------------------------------------------------------------------------------|---------------|-----------------------------------------------------------------|----------------------------------------------------------------------------------------------------------------------------------------------------------------------------------------------------------------------------------------------------------------------------------------------------------------------------------------------------------------------------------------------------------------------------------------------------------------------------------------------------------------------------------------------------------------------------------|-----------------------------------------------------------------------------------------------|--------------------------------------------------------------------------------|
| DOI: <a href="https://doi.org/10.1071/AH14241">10.1071/AH14241</a>                                                                                                                                                                                                                                                              |               |                                                                 | interdisciplinary program in a health service clinic.                                                                                                                                                                                                                                                                                                                                                                                                                                                                                                                            |                                                                                               | Nursing<br>Physiotherapy<br>Psychology                                         |
| Rose, M. A., Lyons, K. J., Miller, P. K. S., & Cornman-Levy, D. (2003). The effect of an interdisciplinary community health project on student attitudes toward community health, people who are indigent and homeless, and team leadership skill development. <i>Journal of allied health, 32</i> (2), 122-125.<br>DOI: no doi | United States | Primary research<br>(Quantitative)                              | The purpose of this article was to examine whether students' attitudes about community health practice, attitudes toward people who are indigent and homeless, and perceived leadership skills changed after participation in a planned interdisciplinary community health experience with an urban homeless or formerly homeless population. It was also to describe an interdisciplinary community health project, based on the Community Health Empowerment Model (CHEM), for graduate students in nursing, medicine, occupational therapy, physical therapy and social work. | <i>Homeless shelters and transitional housing facilities</i><br>- shared practicum experience | Medicine<br>Nursing<br>Occupational therapy<br>Physical therapy<br>Social work |
| Ryan, M., Vanderbilt, A. A., Mayer, S. D., & Gregory, A. (2015). Interprofessional education as a method to address health needs in a Hispanic community setting: A pilot                                                                                                                                                       | United States | Primary research<br>(Quantitative – pre/post test design)       | An aim/purpose of article was not explicitly stated. Authors compared student attitudes towards community service before and after their experience.                                                                                                                                                                                                                                                                                                                                                                                                                             | <i>Collaboration between community resources and university</i>                               | Medicine<br>Nursing<br>Pharmacy                                                |



| Author                                                                                                                                                                                                                                                                                                                                 | Country      | Literature Typology<br>(methodological approach, if applicable) | Purpose or Aim of Article                                                                                                                                                                                                                                                               | Setting(s)<br>IPP Education Approach/<br>Strategies                                                    | Student Disciplines Involved |
|----------------------------------------------------------------------------------------------------------------------------------------------------------------------------------------------------------------------------------------------------------------------------------------------------------------------------------------|--------------|-----------------------------------------------------------------|-----------------------------------------------------------------------------------------------------------------------------------------------------------------------------------------------------------------------------------------------------------------------------------------|--------------------------------------------------------------------------------------------------------|------------------------------|
| study. <i>Journal of Interprofessional Care</i> , 29(5), 515-517.<br>DOI: <a href="https://doi.org/10.3109/13561820.2015.1020360">10.3109/13561820.2015.1020360</a>                                                                                                                                                                    |              |                                                                 |                                                                                                                                                                                                                                                                                         | - direct care provision                                                                                |                              |
| Saunders, R., Dugmore, H., Seaman, K., Singer, R., & Lake, F. (2019). Interprofessional learning in ambulatory care. <i>The Clinical Teacher</i> , 16(1), 41-46.<br>DOI: <a href="https://doi.org/10.1111/tct.12764">10.1111/tct.12764</a>                                                                                             | Australia    | Program evaluation<br>(Mixed methods)                           | The purpose of this study was to evaluate an interprofessional placement in ambulatory care for medical and nursing students.                                                                                                                                                           | <i>Specialty clinics</i><br>- IP groupwork<br>- case conferences<br>- direct care provision            | Medicine<br>Nursing          |
| Schellack, N., Wium, A. M., Ehlert, K., van Aswegen, Y., & Gous, A. (2015). Establishing a pharmacotherapy induced ototoxicity programme within a service-learning approach. <i>South African Journal of Communication Disorders</i> , 62(1), 1-7.<br>DOI: <a href="https://doi.org/10.4102/sajcd.v62i1.96">10.4102/sajcd.v62i1.96</a> | South Africa | Program description                                             | The main aim of this article was to describe the collaboration between two disciplines (SMU – Department of Pharmacy and the Discipline of Speech-Language Pathology and Audiology) in the initiation of a pharmacotherapy induced ototoxicity clinic within a servicelearning approach | <i>Tertiary hospital</i><br>- service-learning activity<br>- IP team meetings<br>- reflective journals | Audiology<br>Pharmacy        |
| Seaman, K., Saunders, R., Dugmore, H., Tobin, C., Singer, R., & Lake, F. (2018). Shifts in nursing and medical students' attitudes, beliefs and behaviours about interprofessional work: An interprofessional placement in ambulatory care. <i>Journal of Clinical Nursing</i> , 27(15-16), 3123-3130.                                 | Australia    | Primary research<br>(Mixed methods)                             | The purpose of this article was to examine students' beliefs, behaviours and attitudes in relation to interprofessional socialisation, and their expectations and experience, before and after a 2-week clinical placement in ambulatory care.                                          | <i>Outpatient clinics</i><br>- IP groupwork<br>- direct care provision                                 | Medicine<br>Nursing          |

| Author                                                                                                                                                                                                                                                                                                                                                                  | Country       | Literature Typology<br>(methodological approach, if applicable)                                 | Purpose or Aim of Article                                                                                                                                                                                                                                         | Setting(s)<br>IPP Education Approach/<br>Strategies                                                                                                         | Student Disciplines Involved                                                            |
|-------------------------------------------------------------------------------------------------------------------------------------------------------------------------------------------------------------------------------------------------------------------------------------------------------------------------------------------------------------------------|---------------|-------------------------------------------------------------------------------------------------|-------------------------------------------------------------------------------------------------------------------------------------------------------------------------------------------------------------------------------------------------------------------|-------------------------------------------------------------------------------------------------------------------------------------------------------------|-----------------------------------------------------------------------------------------|
| DOI: <a href="https://doi.org/10.1111/jocn.14506">10.1111/jocn.14506</a>                                                                                                                                                                                                                                                                                                |               |                                                                                                 |                                                                                                                                                                                                                                                                   |                                                                                                                                                             |                                                                                         |
| Seif, G., Coker-Bolt, P., Kraft, S., Gonsalves, W., Simpson, K., & Johnson, E. (2014). The development of clinical reasoning and interprofessional behaviors: service-learning at a student-run free clinic. <i>Journal of Interprofessional Care</i> , 28(6), 559-564.<br>DOI: <a href="https://doi.org/10.3109/13561820.2014.921899">10.3109/13561820.2014.921899</a> | United States | Primary research<br>(Quantitative – prospective cohort quasi-experimental pre/post test design) | The purpose of this article was to examine the benefits of utilizing SRFCs as a service learning experience that not only improves access to patient care but also fosters positive interprofessional attitudes and enhances students' clinical reasoning skills. | <i>Student-run clinic</i><br>- lecture<br>- clinical skills practice<br>- direct care provision                                                             | Medicine<br>Occupational therapy<br>Pharmacy<br>Physical therapy<br>Physician assistant |
| Shakoor, K., Boelens, L., & Yingling, C. (2023). Improving nurse practitioner practice readiness in an interprofessional student-run free clinic. <i>Journal for Nurse Practitioners</i> , 19(7), 104647.<br>DOI: <a href="https://doi.org/10.1016/j.nurpra.2023.104647">10.1016/j.nurpra.2023.104647</a>                                                               | United States | Program description                                                                             | This report described the process and benefits of shared learning experiences between students in various health programs.                                                                                                                                        | <i>Student-run free clinic (rural)</i><br>- - team-based care delivery<br>- joint patient history taking<br>- shared workspaces to facilitate collaboration | Medicine<br>Nursing<br>Nurse practitioner<br>Pharmacy<br>Public health<br>Social work   |
| Sicat, B. L., Huynh, C., Willett, R., Polich, S., & Mayer, S. (2014). Interprofessional education in a primary care teaching clinic: findings from a study involving pharmacy and medical students. <i>Journal of Interprofessional Care</i> , 28(1), 71-73.<br>DOI: <a href="https://doi.org/10.3109/13561820.2013.829424">10.3109/13561820.2013.829424</a>            | United States | Primary research<br>(Quantitative – pre/post surveys)                                           | The purpose of this study was to examine the impact of that IPE experience on students' perceptions and attitudes towards one another and towards team-based patient care.                                                                                        | <i>Primary care clinic</i><br>- patient interview<br>- case conference                                                                                      | Medicine<br>Pharmacy                                                                    |

| Author                                                                                                                                                                                                                                                                           | Country        | Literature Typology<br>(methodological approach, if applicable)       | Purpose or Aim of Article                                                                                                                                                                                                                                                                                                                | Setting(s)<br>IPP Education Approach/<br>Strategies                                                                                                                            | Student Disciplines Involved                  |
|----------------------------------------------------------------------------------------------------------------------------------------------------------------------------------------------------------------------------------------------------------------------------------|----------------|-----------------------------------------------------------------------|------------------------------------------------------------------------------------------------------------------------------------------------------------------------------------------------------------------------------------------------------------------------------------------------------------------------------------------|--------------------------------------------------------------------------------------------------------------------------------------------------------------------------------|-----------------------------------------------|
| Snyman, S., & Donald, H. (2019). Interprofessional service-learning: Cutting teeth and learning to crawl. <i>Journal of Interprofessional Care</i> , 33(3), 328-335.<br>DOI: <a href="https://doi.org/10.1080/13561820.2019.1611288">10.1080/13561820.2019.1611288</a>           | South Africa   | Primary research<br>(Qualitative – interpretive qualitative approach) | The study aimed to determine how this learning experience influenced students' interprofessional person-centered practice.                                                                                                                                                                                                               | <i>Community based organizations</i><br>- community needs assessments<br>- planning and development of intervention<br>- implementation of plan and working as “case managers” | Dietetics<br>Medicine<br>Occupational therapy |
| Solomon, P., & Jung, B. (2006). An interprofessional role-emerging placement in HIV rehabilitation. <i>International Journal of Therapy and Rehabilitation</i> , 13(2), 59-65.<br>DOI: <a href="https://doi.org/10.12968/ijtr.2006.13.2.21354">10.12968/ijtr.2006.13.2.21354</a> | Canada         | Program description                                                   | The purpose of this article was to highlight the current issues related to OT and PT management of people living with HIV, to describe the development and evaluation of a role-emerging, IP clinical placement at a community health centre servicing patients with HIV and to discuss the learning points from students' perspectives. | <i>Community health centre</i><br>- needs assessment<br>- case planning and development<br>- case presentation                                                                 | Occupational therapy<br>Physical therapy      |
| Street, K. N., Eaton, N., Clarke, B., Ellis, M., Young, P. M., Hunt, L., & Emond, A. (2007). Child disability case studies: An interprofessional learning opportunity for medical students and paediatric nursing                                                                | United Kingdom | Primary research<br>(Mixed methods – randomized control study)        | An aim/purpose of article was not explicitly stated but the authors describe the development and evaluation of a practice-based interprofessional learning opportunity for pre-                                                                                                                                                          | <i>Home and school visits</i><br>- worked in IP pairs<br>- home and school visits with a child                                                                                 | Medicine<br>Nursing                           |

| Author                                                                                                                                                                                                                                                                                                                | Country     | Literature Typology (methodological approach, if applicable)  | Purpose or Aim of Article                                                                                                                                                            | Setting(s) IPP Education Approach/ Strategies                                                                                                                                                               | Student Disciplines Involved                                                                   |
|-----------------------------------------------------------------------------------------------------------------------------------------------------------------------------------------------------------------------------------------------------------------------------------------------------------------------|-------------|---------------------------------------------------------------|--------------------------------------------------------------------------------------------------------------------------------------------------------------------------------------|-------------------------------------------------------------------------------------------------------------------------------------------------------------------------------------------------------------|------------------------------------------------------------------------------------------------|
| students. <i>Medical Education</i> , 41(8), 771-780.<br>DOI: <a href="https://doi.org/10.1111/j.1365-2923.2007.02800.x">10.1111/j.1365-2923.2007.02800.x</a>                                                                                                                                                          |             |                                                               | qualification medical and pediatric nursing students using community-based studies of children with disabilities and their family.                                                   | - presentation to peers with feedback from tutor                                                                                                                                                            |                                                                                                |
| Tervaskanto-Maentausta, T., Taanila, A., Ukkola, O., Mikkila, L., Jokinen, J., & Varkki, E. (2017). Collaborative diabetes training in outpatient primary care. <i>Journal of European CME</i> , 6(1), 1288490.<br>DOI: <a href="https://doi.org/10.1080/21614083.2017.1288490">10.1080/21614083.2017.1288490</a>     | Finland     | Primary research (Quantitative)                               | This paper described the development and evaluation of a practice-based IPL opportunity.                                                                                             | <i>Primary care and specialized hospital settings</i><br>- IP triads planned and conducted outpatient client visits<br>- joint discussions with facilitating physician and nurse<br>- reflective debriefing | Medicine<br>Nursing                                                                            |
| Toth-Pal, E., Fridén, C., Asenjo, S. T., & Olsson, C. B. (2020). Home visits as an interprofessional learning activity for students in primary healthcare. <i>Primary Health Care Research &amp; Development</i> , 21, e59.<br>DOI: <a href="https://doi.org/10.1017/S1463423620000572">10.1017/S1463423620000572</a> | Sweden      | Primary research (Mixed methods – likert scale, focus groups) | The aim of this project was to implement and evaluate person-centred home visits as an educational model of IPL in primary healthcare during healthcare students' clinical practice. | <i>Primary healthcare units</i><br>- direct care provision<br>- care planning<br>- case conference<br>- reflections                                                                                         | Dietitian<br>Medicine<br>Nursing<br>Occupational therapy<br>Physical therapy<br>Speech therapy |
| van Lierop, M., van Dongen, J., Janssen, M., Smeets, H., van Bokhoven, L., &                                                                                                                                                                                                                                          | Netherlands | Program description                                           | The purpose of this article was to describe a program where the                                                                                                                      | <i>Primary care clinic</i>                                                                                                                                                                                  | Medicine<br>Nursing                                                                            |

| Author                                                                                                                                                                                                                                                                                                                                                                                            | Country       | Literature Typology (methodological approach, if applicable)               | Purpose or Aim of Article                                                                                                                                                                                                                                         | Setting(s) IPP Education Approach/ Strategies                                                                                                                                                                                                                                                                                                                                         | Student Disciplines Involved                                         |
|---------------------------------------------------------------------------------------------------------------------------------------------------------------------------------------------------------------------------------------------------------------------------------------------------------------------------------------------------------------------------------------------------|---------------|----------------------------------------------------------------------------|-------------------------------------------------------------------------------------------------------------------------------------------------------------------------------------------------------------------------------------------------------------------|---------------------------------------------------------------------------------------------------------------------------------------------------------------------------------------------------------------------------------------------------------------------------------------------------------------------------------------------------------------------------------------|----------------------------------------------------------------------|
| Moser, A. (2019). Jointly discussing care plans for real-life patients: the potential of a student-led interprofessional team meeting in undergraduate health professions education. <i>Perspectives on Medical Education</i> , 8, 372-377.<br>DOI: <a href="https://doi.org/10.1007/s40037-019-00543-6">10.1007/s40037-019-00543-6</a>                                                           |               |                                                                            | authors developed a learning activity in which undergraduate medical, nursing and allied healthcare students practice interprofessional collaboration during a student-led interprofessional team meeting.                                                        | <ul style="list-style-type: none"> <li>- direct care provision</li> <li>- care planning and review</li> <li>- case conferences</li> <li>- team reflection</li> </ul>                                                                                                                                                                                                                  | Occupational therapy<br>Physiotherapy<br>Speech and language therapy |
| Wang, J., Hu, X., Liu, J., & Li, L. (2016). Pharmacy students' attitudes towards physician-pharmacist collaboration: Intervention effect of integrating cooperative learning into an interprofessional team-based community service. <i>Journal of Interprofessional Care</i> , 30(5), 591-598.<br>DOI: <a href="https://doi.org/10.1080/13561820.2016.1185095">10.1080/13561820.2016.1185095</a> | China         | Primary research (Quantitative - Quasi-experimental pre/post intervention) | The aim of this study was to evaluate the attitudes towards physician-pharmacist collaboration among pharmacy students in order to develop an IPE opportunity through integrating cooperative learning into team-based student-supported community service event. | <i>Local community settings</i> <ul style="list-style-type: none"> <li>- initial meeting to bring students together for IPE activity and organize teams</li> <li>- cooperative learning tasks assigned to teams</li> <li>- group reports on preparatory work</li> <li>- negotiation of roles and responsibilities</li> <li>- discipline-specific assessments and education</li> </ul> | Medicine<br>Pharmacy                                                 |
| Wang, T., & Bhakta, H. (2013). A new model for interprofessional collaboration at a student-run free                                                                                                                                                                                                                                                                                              | United States | Program description                                                        | An aim/purpose of article was not explicitly stated. Authors                                                                                                                                                                                                      | <i>Student-run clinic</i>                                                                                                                                                                                                                                                                                                                                                             | Graduate nursing<br>Medicine                                         |

| Author                                                                                                                                                                                                                                                                                                                                                                                                                    | Country       | Literature Typology<br>(methodological approach, if applicable)   | Purpose or Aim of Article                                                                                                                                                                            | Setting(s)<br>IPP Education Approach/<br>Strategies                                                                                                                                                          | Student Disciplines Involved                                           |
|---------------------------------------------------------------------------------------------------------------------------------------------------------------------------------------------------------------------------------------------------------------------------------------------------------------------------------------------------------------------------------------------------------------------------|---------------|-------------------------------------------------------------------|------------------------------------------------------------------------------------------------------------------------------------------------------------------------------------------------------|--------------------------------------------------------------------------------------------------------------------------------------------------------------------------------------------------------------|------------------------------------------------------------------------|
| <p>clinic. <i>Journal of Interprofessional Care</i>, 27(4), 339-340.<br/>DOI: <a href="https://doi.org/10.3109/13561820.2012.761598">10.3109/13561820.2012.761598</a></p>                                                                                                                                                                                                                                                 |               |                                                                   | provided a description of the program.                                                                                                                                                               | <ul style="list-style-type: none"> <li>- direct care provision</li> <li>- case presentation</li> </ul>                                                                                                       |                                                                        |
| <p>Warner, P., Jelinek, H., &amp; Davidson, P. M. (2010). A university clinic: an innovative model for improving clinical practice. <i>Australian Journal of Advanced Nursing, The</i>, 27(4), 38-42.<br/>DOI: no doi</p>                                                                                                                                                                                                 | Australia     | Primary research<br>(Quantitative)                                | An aim/purpose of article was not explicitly stated. Authors appeared to evaluate an interdisciplinary program designed to improve and extend clinical skills of undergraduate health care students. | <i>University campus</i> <ul style="list-style-type: none"> <li>- clinical skills station</li> <li>- IP groupwork sharing/exchanging discipline specific knowledge</li> <li>- debriefing sessions</li> </ul> | Undergraduate nursing<br>Undergraduate podiatry                        |
| <p>Weinstein, A. R., Dolce, M. C., Koster, M., Parikh, R., Hamlyn, E., McNamara, E. A., Carlson, A., &amp; DiVall, M. V. (2018). Integration of systematic clinical interprofessional training in a student-faculty collaborative primary care practice. <i>Journal of Interprofessional Care</i>, 32(1), 104-107.<br/>DOI: <a href="https://doi.org/10.1080/13561820.2017.1355296">10.1080/13561820.2017.1355296</a></p> | United States | Primary research<br>(Quantitative – pre/post intervention design) | An aim/purpose of article was not explicitly stated. Authors presented an evaluation of the perceived impact of IPE curriculum/practice on students' attitude towards team-based care.               | <i>Tertiary medical center</i> <ul style="list-style-type: none"> <li>- IP groupwork</li> <li>- huddles</li> <li>- IP direct care provision</li> <li>- debrief session</li> </ul>                            | Masters of public health<br>Medicine<br>Nurse practitioner<br>Pharmacy |
| <p>Weller-Newton, J. M., &amp; Kent, F. (2021). Community health placements for junior medical and nursing students for interprofessional learning. <i>Journal of Interprofessional Care</i>, 35(2), 316-319.</p>                                                                                                                                                                                                         | Australia     | Primary research<br>(Mixed methods)                               | The purpose of this article was to investigate the value of interprofessional clinical placements at a community health center for dyads of second                                                   | <i>Community health services</i> <ul style="list-style-type: none"> <li>- consultation observation</li> </ul>                                                                                                | Medicine<br>Nursing                                                    |

| Author                                                                                                                                                                                                                                                                                                                                        | Country       | Literature Typology (methodological approach, if applicable) | Purpose or Aim of Article                                                                                                                                                            | Setting(s) IPP Education Approach/ Strategies                                                        | Student Disciplines Involved                                                                            |
|-----------------------------------------------------------------------------------------------------------------------------------------------------------------------------------------------------------------------------------------------------------------------------------------------------------------------------------------------|---------------|--------------------------------------------------------------|--------------------------------------------------------------------------------------------------------------------------------------------------------------------------------------|------------------------------------------------------------------------------------------------------|---------------------------------------------------------------------------------------------------------|
| DOI: <a href="https://doi.org/10.1080/13561820.2020.1760803">10.1080/13561820.2020.1760803</a>                                                                                                                                                                                                                                                |               |                                                              | year medical and nursing students.                                                                                                                                                   |                                                                                                      |                                                                                                         |
| Weppner, W. G., Davis, K., Sordahl, J., Willis, J., Fisher, A., Brotman, A., Tivis, R., Gordon, T., & Smith, C. S. (2016). Interprofessional care conferences for high-risk primary care patients. <i>Academic Medicine</i> , 91(6), 798-802.<br>DOI: <a href="https://doi.org/10.1097/ACM.0000000000001151">10.1097/ACM.0000000000001151</a> | United States | Program description                                          | An aim/purpose of article was not explicitly stated. Authors described a program design and implementation of the PACT-ICU (Patient-aligned Care Team Interprofessional Care Update) | <i>Veteran affairs center</i><br>- case presentation<br>- conference sessions<br>- clinical training | Clinical psychology<br>Nurse practitioners<br>Nursing<br>Pharmacy<br>Physician residents<br>Social work |
